# Supplementary material for: Development and testing of Australian prehospital care quality indicators: study protocol
Source: PubMed Central journal article supplement — BMJ Open. 2020 Jul 31;10(7):e038310. doi: 10.1136/bmjopen-2020-038310 (PMC7398091; doi:10.1136/bmjopen-2020-038310), 2020-07-31
Supplement: bmjopen-2020-038310.draft_revisions.pdf [file bmjopen-2020-038310.draft_revisions.pdf]

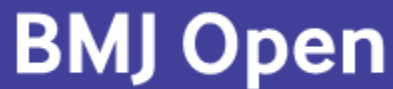

BMJ Open is committed to open peer review. As part of this commitment we make the peer review history of every article we publish publicly available.

When an article is published we post the peer reviewers' comments and the authors' responses online. We also post the versions of the paper that were used during peer review. These are the versions that the peer review comments apply to.

The versions of the paper that follow are the versions that were submitted during the peer review process. They are not the versions of record or the final published versions. They should not be cited or distributed as the published version of this manuscript.

BMJ Open is an open access journal and the full, final, typeset and author-corrected version of record of the manuscript is available on our site with no access controls, subscription charges or pay-per-view fees (<http://bmjopen.bmj.com>).

If you have any questions on BMJ Open's open peer review process please email [info.bmjopen@bmj.com](mailto:info.bmjopen@bmj.com)

# BMJ Open

## The development and testing of Australian prehospital care quality indicators: study protocol

|                               |                                                                                                                                                                                                                                                                                                        |
|-------------------------------|--------------------------------------------------------------------------------------------------------------------------------------------------------------------------------------------------------------------------------------------------------------------------------------------------------|
| Journal:                      | <i>BMJ Open</i>                                                                                                                                                                                                                                                                                        |
| Manuscript ID                 | bmjopen-2020-038310                                                                                                                                                                                                                                                                                    |
| Article Type:                 | Protocol                                                                                                                                                                                                                                                                                               |
| Date Submitted by the Author: | 05-Mar-2020                                                                                                                                                                                                                                                                                            |
| Complete List of Authors:     | Pap, Robin; Western Sydney University, School of Science and Health Lockwood, Craig; University of Adelaide, Joanna Briggs Institute Stephenson, Matthew; University of Adelaide, Joanna Briggs Institute Simpson, Paul; Western Sydney University - Campbelltown Campus, School of Science and Health |
| Keywords:                     | ACCIDENT & EMERGENCY MEDICINE, Quality in health care < HEALTH SERVICES ADMINISTRATION & MANAGEMENT, HEALTH SERVICES ADMINISTRATION & MANAGEMENT                                                                                                                                                       |
|                               |                                                                                                                                                                                                                                                                                                        |

SCHOLARONE™  
Manuscripts

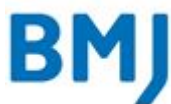

I, the Submitting Author has the right to grant and does grant on behalf of all authors of the Work (as defined in the below author licence), an exclusive licence and/or a non-exclusive licence for contributions from authors who are: i) UK Crown employees; ii) where BMJ has agreed a CC-BY licence shall apply, and/or iii) in accordance with the terms applicable for US Federal Government officers or employees acting as part of their official duties; on a worldwide, perpetual, irrevocable, royalty-free basis to BMJ Publishing Group Ltd ("BMJ") its licensees and where the relevant Journal is co-owned by BMJ to the co-owners of the Journal, to publish the Work in this journal and any other BMJ products and to exploit all rights, as set out in our [licence](#).

The Submitting Author accepts and understands that any supply made under these terms is made by BMJ to the Submitting Author unless you are acting as an employee on behalf of your employer or a postgraduate student of an affiliated institution which is paying any applicable article publishing charge ("APC") for Open Access articles. Where the Submitting Author wishes to make the Work available on an Open Access basis (and intends to pay the relevant APC), the terms of reuse of such Open Access shall be governed by a Creative Commons licence – details of these licences and which [Creative Commons](#) licence will apply to this Work are set out in our licence referred to above.

Other than as permitted in any relevant BMJ Author's Self Archiving Policies, I confirm this Work has not been accepted for publication elsewhere, is not being considered for publication elsewhere and does not duplicate material already published. I confirm all authors consent to publication of this Work and authorise the granting of this licence.

**The development and testing of Australian prehospital care quality indicators:  
study protocol**

**Robin Pap<sup>1,2\*</sup>, Craig Lockwood<sup>1</sup>, Matthew Stephenson<sup>1</sup>, Paul Simpson<sup>2</sup>**

1. Joanna Briggs Institute, University of Adelaide, Adelaide, Australia

2. School of Science and Health, Western Sydney University, Sydney, Australia

\* Corresponding author

Postal Address: 55 King William Road  
SA 5006 North Adelaide  
Australia

Email: Robin Pap: [robin.pap@adelaide.edu.au](mailto:robin.pap@adelaide.edu.au)

1  
2  
3  
4  
5  
6  
7  
8  
9  
10  
11  
12  
13  
14  
15  
16  
17  
18  
19  
20  
21  
22  
23  
24  
25  
26  
27  
28  
29  
30  
31  
32  
33  
34  
35  
36  
37  
38  
39  
40  
41  
42  
43  
44  
45  
46  
47  
48  
49  
50  
51  
52  
53  
54  
55  
56  
57  
58  
59  
60

**Abstract**

**Introduction** Historically, ambulance services were established to provide rapid transport of patients to hospital. Contemporary prehospital care involves provision of sophisticated ‘mobile healthcare’ to patients across the lifespan presenting with a range of injuries or illnesses of varying acuity. Because of its young age, the paramedicine profession has until recently experienced a lack of research capacity which has led to paucity of a discipline-specific, scientific evidence-base. Therefore, the performance and quality of ambulance services has traditionally been measured using simple, evidence-poor indicators forming a deficient reflection of the true quality of care and providing little direction for quality improvement efforts. This paper reports the study protocol for the development and testing of quality indicators for the Australian prehospital care setting.

**Methods and analysis** This project has three phases. In the first phase, preliminary work in the form of a scoping review was conducted which provided an initial list of quality indicators. In the subsequent phase, these quality indicators will be developed by aggregating them and by performing related rapid reviews. The summarised evidence will be used to support an expert consensus process aimed at optimising the clarity and evaluating the validity of proposed quality indicators. Finally, in the third phase those quality indicators deemed valid will be tested for acceptability, feasibility and reliability using mixed research methods. Evidence-based indicators can facilitate meaningful measurement of the quality of care provided. This forms the first step to identify unwarranted variation and direction for improvement work. This project will develop and test of quality indicators for the Australian prehospital care setting.

**Ethics and dissemination** This project has been approved by the University of Adelaide Human Research Ethics Committee. Findings will be communicated using a comprehensive dissemination strategy.

**Keywords:** Emergency medical services; healthcare quality assessment; prehospital care; quality indicators

## Strengths and limitations of the study

- A preliminary list of prehospital care quality indicators was established using systematic scoping review methods.
- A rapid review and evidence summary approach will be used to inform a modified RAND/UCLA Appropriateness Method.
- Australian prehospital care experts will evaluate the validity proposed quality indicators.
- Candidate quality indicators will be tested for acceptability, feasibility and reliability.
- The evidence supporting many of the quality indicators is expected to be weak.

## Introduction

The quality and safety of health care is on the agenda in any modern health care organisation, including ambulance services. Strategies to continuously improve the quality of service should primarily be based on information about the level of quality produced by the health care organisation.<sup>1</sup> Indicators of desirable structures, processes and outcomes allow the quality of care and services to be measured. This assessment can be facilitated by systematically developing quality indicators that describe the performance that should occur, and then measuring and monitoring whether a service's operations and patient care are consistent with these indicators.<sup>2</sup>

For the purpose of this project, the context of prehospital care is limited to the health care services provided by ambulance services. Historically, the function of ambulance services was primarily one of transport; paramedics would provide only stabilising care to patients with high-acuity presentations before transporting to an emergency department. However, ambulance service models of care have evolved considerably. Contemporary prehospital care involves provision of often complex 'mobile healthcare' to patients across the lifespan presenting with injury or illness across the spectrum of acuity. An increasingly aged

1  
2  
3 82 population and an increased incidence of chronic disease have led to a substantial increase  
4  
5 83 in non-emergency, or 'low acuity' presentations for whom the traditional emergency  
6  
7 84 department disposition may not be most appropriate.<sup>3,4</sup> Ambulance services now play a key  
8  
9 85 role in integrated health care frameworks, with transport to an emergency department being  
10  
11 86 one of many disposition outcomes following care from paramedics alongside referral into  
12  
13 87 primary and community-based healthcare. On the other verge of the patient spectrum,  
14  
15 88 ambulance services continue to provide critical care and transport for those suffering life-  
16  
17 89 threatening illness or injury.<sup>4,5</sup> Therefore, this project adopts the definition of prehospital  
18  
19 90 care previously developed which encompasses this range of patients seen by ambulance  
20  
21 91 services: Prehospital care is the care that ambulance services provide for patients with real  
22  
23 92 or perceived emergency or urgent care needs from the time point of emergency telephone  
24  
25 93 access until care is concluded or until arrival and transfer of care to a hospital or other health  
26  
27 94 care facility.<sup>6,7</sup>

30 95  
31  
32 96 An indicator is an explicitly defined and measurable element of health care services.<sup>8</sup> A  
33  
34 97 *quality* indicator (QI) is an indicator for which there is evidence or consensus that it can be  
35  
36 98 used to assess the quality, and hence measure changes in quality over time.<sup>9</sup> Essential for  
37  
38 99 the development of QIs is a definition of quality. Proceeding to develop indicators for the  
39  
40 100 measurement of quality without understanding and consensus on what the concept of quality  
41  
42 101 entails is unlikely to result in meaningful assessment of quality.<sup>10</sup> Indicators can be  
43  
44 102 developed using non-systematic and systematic methods.<sup>8</sup> Non-systematic methods are  
45  
46 103 relatively quick; however, they tend not to incorporate all available evidence during their  
47  
48 104 development. Systematically developed QIs are ideally based on high-level scientific  
49  
50 105 evidence or they are derived from evidence-informed guidelines.<sup>8,11</sup> In areas or disciplines  
51  
52 106 with limited scientific evidence, such as paramedicine, it may be necessary to combine the  
53  
54 107 available evidence with expert consensus.<sup>12</sup>

55  
56  
57  
58 108  
59  
60

1  
2  
3 109 As far as possible, QIs should possess the fundamental characteristics clarity, validity,  
4  
5 110 acceptability, feasibility and reliability.<sup>8</sup> A good quality indicator has clear meaning which  
6  
7 111 enables what is being assessed to be precisely attributable to that indicator.<sup>8,13</sup> In other  
8  
9 112 words, a clear QI is one which is free of ambiguity, inaccuracy or imprecision. Validity is  
10  
11 113 arguably the most important property of a quality indicator. In science, validity refers to the  
12  
13 114 degree to which evidence and theory support the interpretation of the scores entailed by  
14  
15 115 proposed uses of the instrument.<sup>14</sup> Thus, in the quality measurement context, validity refers  
16  
17 116 to the degree to which evidence and theory support the expected interpretation of measured  
18  
19 117 elements of practice performance related to the quality indicators. In more simple terms,  
20  
21 118 validity refers to the extent to which the given statement represents high-quality care and  
22  
23 119 would therefore be an endorsed indicator of quality. When assessing the validity of QIs,  
24  
25 120 careful consideration of the intended context is important.<sup>15–17</sup> Whilst there are considerable  
26  
27 121 benefits in using work from other locations, QIs cannot simply be transferred directly  
28  
29 122 between different settings without an intermediate process to allow for variation in  
30  
31 123 professional culture and clinical practice.<sup>18</sup> Rating the validity of QIs, therefore, entails as  
32  
33 124 much assessment of whether they represent high-quality care as it does of how contextually  
34  
35 125 applicable they are. Acceptability refers to the quality of being satisfactory or agreeable in  
36  
37 126 terms of professional standards and values. If the aim of measurement is to provide direction  
38  
39 127 for quality improvement, then the quality indicators need to be interpretable and meaningful  
40  
41 128 to the audience, i.e. clinicians and managers. However, the benefit of assessing quality  
42  
43 129 indicators for acceptability extends beyond their development and testing. Measurement  
44  
45 130 provides information to direct improvement efforts and is thus central to quality  
46  
47 131 improvement.<sup>8,19–23</sup> Involvement of clinicians and managers in the development of indicators  
48  
49 132 is likely to improve their uptake and contributes to sustainability in quality improvement.<sup>24</sup>  
50  
51 133 Measurement of the quality of care may also serve as or contribute to performance appraisal  
52  
53 134 systems. In this instance, user acceptance of such systems may be a critical criterion to  
54  
55 135 ensure the successful implementation.<sup>24</sup> Feasibility and reliability relate to the measurability  
56  
57 136 of a QI. Testing QIs for these attributes is critical and ensures that implementation and  
58  
59  
60

1  
2  
3  
4  
5  
6  
7  
8  
9  
10  
11  
12  
13  
14  
15  
16  
17  
18  
19  
20  
21  
22  
23  
24  
25  
26  
27  
28  
29  
30  
31  
32  
33  
34  
35  
36  
37  
38  
39  
40  
41  
42  
43  
44  
45  
46  
47  
48  
49  
50  
51  
52  
53  
54  
55  
56  
57  
58  
59  
60

sustained measurement is successful. Feasibility relates to the availability or attainability of accurate data and whether this data is realistically collectable.<sup>13</sup> Feasibility thus encompasses technical and non-technical aspects of data collection and analysis. A feasible QI also facilitates measurement which is applicable to quality improvement, sensitive to improvement over time and useful for decision-making.<sup>25</sup> Reliability, in this instance, is closely related to precision and refers to the consistency of scores across replications of a testing procedure.<sup>26</sup> Testing reliability intends to assess whether the QIs are non-erroneously reproducible and for any errors to be identified.<sup>13</sup> A reliable QI facilitates measurement which has low inter- or intra-rater variation and suitable for statistical analyses.<sup>25</sup>

147

Similarly to many other countries, Australia has measures in its national performance indicator framework for ambulance services that track the quality of care delivered to its residents across the various jurisdictions.<sup>27</sup> However, the scope of current measurement is limited. With increasing research activity and the recent commencement of national registration of paramedics in Australia, a timely need to expand the nationally utilised indicators of prehospital care quality exists. Both, an expanding evidence-base and regulations which primarily ensure patient and community safety, ultimately aim to protect and continuously improve the quality of prehospital care. Meaningful measurement based on systematically developed QIs not only produces data to ensure the maintenance of quality, it also provides information on whether or not change is effective in achieving improvement.

158

This paper reports the context and methods for a project on development and testing of prehospital care QIs. The primary aim of the project is to develop and test QIs for the Australian prehospital care setting. To achieve this, the project addresses the following objectives:

1. To map the attributes or dimensions of 'quality' in the context of prehospital care and explore indicators that have been developed internationally to measure prehospital care quality.
2. To develop prehospital care QIs for the Australian setting and to evaluate their validity.
3. To test selected candidate prehospital care QIs for acceptability, feasibility and reliability.

## Methods and analysis

This project consists of three phases (figure 1): An initial scoping review addressing objective 1; Evidence-informed development of prehospital care QIs and an evaluation of their validity using an expert consensus process (modified RAND/UCLA Appropriateness Method) to address objective 2; And finally a mixed methods approach (explanatory sequential design) to test the QIs as detailed in objective 3.

<insert Figure 1 here>

**Figure 1:** Flow diagram detailing the three phases of the project (QI: quality indicator)

### Phase 1: Scoping Review

This phase has been completed and involved preparatory work in the form of a scoping review.<sup>28</sup> The purpose of the review was to map the attributes of 'quality' in the context of prehospital care and to chart existing international prehospital care QIs. The review employed the Joanna Briggs Institute (JBI) methodology for conducting scoping reviews.<sup>29</sup> The objectives, inclusion and exclusion criteria, and methods were specified in advance and documented in a protocol.<sup>30</sup>

1  
2  
3  
4  
5  
6  
7  
8  
9  
10  
11  
12  
13  
14  
15  
16  
17  
18  
19  
20  
21  
22  
23  
24  
25  
26  
27  
28  
29  
30  
31  
32  
33  
34  
35  
36  
37  
38  
39  
40  
41  
42  
43  
44  
45  
46  
47  
48  
49  
50  
51  
52  
53  
54  
55  
56  
57  
58  
59  
60

The review’s systematic search confirmed paucity in literature that defines prehospital care quality or examines which dimensions of generic health care quality definitions are important in prehospital care. However, synthesis of included articles suggested that timely access to appropriate, safe and effective care which is responsive to a patient’s needs and efficient and equitable to populations is reflective of high-quality prehospital care. There is growing interest in developing QIs to evaluate prehospital care. In total, the review charted 526 QIs addressing clinical and non-clinical aspects of ambulance services providing prehospital care. The scoping review highlighted the need for validation of existing prehospital care QIs and *de novo* QI development.

**Phase 2: Evidence-Informed Expert Consensus Process**

Phase 2 will comprise an evidence-informed expert consensus process to optimise the clarity of QIs and evaluate which are valid for the measurement of prehospital care quality in Australia. Preparative work will involve aggregating the dimensions of prehospital care quality and the prehospital care QIs charted in phase 1, as well as performing evidence summaries to inform the expert panel. There are practical advantages, including the critical appraisal of QIs, in aggregating multiple dimensions of quality into a smaller number of principal dimensions.<sup>31</sup> Campbell and colleagues (2000)<sup>31</sup> argue that there are two overarching dimensions of quality of care; access and effectiveness. Aggregation of attributes of prehospital care quality into these two key dimensions has previously been performed by Owen (2010).<sup>7</sup>

The development of the evidence summaries will be guided by the JBI approach for rapid reviews and evidence summaries.<sup>32</sup> Figure 2 provides a diagrammatic outline of the rapid review and evidence summary process.

<insert Figure 2 here>

**Figure 2:** The evidence summary development process (adopted from Munn, Lockwood & Moola, 2015<sup>32</sup>)

Literature searches will be undertaken in the following databases: PubMed, CINAHL, the JBI Database of Systematic Reviews and Implementation Reports and the Cochrane Library. Table 1 details an example of search terms used. Generally, terms related to prehospital care will be combined with QI specific terms. Development of the terms related to prehospital care will be guided by search filters created by Olausson, et al.<sup>33</sup> Only English language papers will be included for pragmatic reasons. Searches will not be limited by date. The search will also include backtracking of references. In line with JBI's approach to evidence summaries,<sup>32,34</sup> the best available evidence will be incorporated in each summary. This means that lower-level evidence will be included only when no systematic reviews are located. The JBI levels of evidence are detailed in Table 2.

**Table 1** Example of search terms/filters used in PubMed

| Concept              | [1] Prehospital Care                                                                                                                                                                                                                                                                | [2] QI                    |
|----------------------|-------------------------------------------------------------------------------------------------------------------------------------------------------------------------------------------------------------------------------------------------------------------------------------|---------------------------|
| <b>Search terms</b>  | Ambulances[mh] OR Emergency Medical Technicians[mh] OR Air Ambulances[mh] OR paramedic*[tiab] OR ems[tiab] OR emt[tiab] OR prehospital[tiab] OR pre-hospital[tiab] OR first responder*[tiab] OR emergency medical technician*[tiab] OR emergency services[tiab] OR ambulance*[tiab] | (QI related search terms) |
| <b>Search Filter</b> | [1] AND [2], English only; Systematic Reviews and Meta-Analyses/Meta-Synthesis only (Change to '[1] AND [2], English only' if no or poor-quality Systematic Reviews and Meta-Analyses/Meta-Synthesis are identified)                                                                |                           |

Following the search, titles and abstracts will be screened. If potentially eligible, the full text of the papers will be read to determine whether the article should be included in the applicable evidence summary. Full-text reading will involve an assessment of internal validity utilising an abridged critical appraisal tool (Table 3). The rapid reviews and evidence summaries that will be developed for this study will have several limitations. The more a

rapid review adheres to the methodological rigor of systematic reviews, the longer it will take to complete.<sup>32,35,36</sup> Therefore, the less time is taken to complete a rapid review the less thorough it will be. The JBI approach to evidence summaries aims for a rapid development cycle.<sup>32</sup> This method is considered suitable for the purpose of this project considering the limited resources and time available. These restrictions also mean that there will be only one researcher to screen, select, appraise and summarise the evidence and no peer review will be undertaken which may inevitable introduce increased risk of bias and error.

**Table 2** JBI Levels of Evidence for Effectiveness, Diagnosis and Meaningfulness<sup>34</sup> (JBI: Joanna Briggs Institute)

| Level of Evidence | Study Designs                                                                                                                                                                                                                                                                                          |                                                                                                                                                                                                         |                                                |
|-------------------|--------------------------------------------------------------------------------------------------------------------------------------------------------------------------------------------------------------------------------------------------------------------------------------------------------|---------------------------------------------------------------------------------------------------------------------------------------------------------------------------------------------------------|------------------------------------------------|
|                   | Effectiveness                                                                                                                                                                                                                                                                                          | Diagnosis                                                                                                                                                                                               | Meaningfulness                                 |
| 1                 | Experimental Designs including:<br>a. Systematic review of Randomized Controlled Trials (RCTs)<br>b. Systematic review of RCTs and other study designs<br>c. RCTs<br>d. Pseudo-RCTs                                                                                                                    | Studies of test accuracy among consecutive patients:<br>a. Systematic review of studies of test accuracy among consecutive patients<br>b. Study of test accuracy among consecutive patients             | Qualitative or mixed-methods systematic review |
| 2                 | Quasi-Experimental Designs including:<br>a. Systematic review of quasi-experimental studies<br>b. Systematic review of quasi-experimental and other lower study designs<br>c. Quasi-experimental prospectively controlled study<br>d. Pre-test post-test or historic/retrospective control group study | Studies of Test Accuracy among non-consecutive patients:<br>a. Systematic review of studies of test accuracy among non-consecutive patients<br>b. Study of test accuracy among non-consecutive patients | Qualitative or mixed-methods synthesis         |
| 3                 | Observational – Analytic Designs including:<br>a. Systematic review of comparable cohort studies<br>b. Systematic review of comparable cohort and other lower study designs<br>c. Cohort study with control group<br>d. Case-controlled study<br>e. Observational study without a control group        | Diagnostic Case control studies:<br>a. Systematic review of diagnostic case control studies<br>b. Diagnostic case-control study                                                                         | Single qualitative study                       |
| 4                 | Observational – Descriptive Designs including:<br>a. Systematic review of descriptive studies<br>b. Cross-sectional study<br>c. Case series<br>d. Case study                                                                                                                                           | Diagnostic yield studies:<br>a. Systematic review of diagnostic yield studies<br>b. Individual diagnostic yield study                                                                                   | Systematic review of expert opinion            |
| 5                 | Expert Opinion and Bench Research including:                                                                                                                                                                                                                                                           | Expert Opinion and Bench Research:                                                                                                                                                                      | Expert opinion                                 |

|  |                                                                                                          |                                                                                                           |  |
|--|----------------------------------------------------------------------------------------------------------|-----------------------------------------------------------------------------------------------------------|--|
|  | a. Systematic review of expert opinion<br>b. Expert consensus<br>c. Bench research/single expert opinion | a. Systematic review of expert opinion<br>b. Expert consensus<br>c. Bench research/ single expert opinion |  |
|--|----------------------------------------------------------------------------------------------------------|-----------------------------------------------------------------------------------------------------------|--|

**Table 3** Abridged Quality Appraisal Criteria for JBI Evidence Summaries<sup>32</sup> (JBI: Joanna Briggs Institute)

| Type of Study/Evidence       | Quality Appraisal Criteria                                                                                                                                                                                                                                                                                                                                                                                                                                                                                 |
|------------------------------|------------------------------------------------------------------------------------------------------------------------------------------------------------------------------------------------------------------------------------------------------------------------------------------------------------------------------------------------------------------------------------------------------------------------------------------------------------------------------------------------------------|
| <b>Systematic Review</b>     | <ul style="list-style-type: none"> <li>Is the review question clearly and explicitly stated?</li> <li>Was the search strategy appropriate?</li> <li>Were the inclusion criteria appropriate for the review question?</li> <li>Were the criteria for appraising studies appropriate?</li> <li>Was critical appraisal by two or more independent reviewers?</li> <li>Were there methods used to minimize error in data extraction?</li> <li>Were the methods used to combine studies appropriate?</li> </ul> |
| <b>Quantitative Evidence</b> | <ul style="list-style-type: none"> <li>Was there appropriate randomization?</li> <li>Was allocation concealed?</li> <li>Was blinding to allocation maintained?</li> <li>Was incompleteness of data addressed?</li> <li>Were outcomes reported accurately?</li> </ul>                                                                                                                                                                                                                                       |
| <b>Qualitative Evidence</b>  | <ul style="list-style-type: none"> <li>Was the research design appropriate for the research?</li> <li>Was the recruitment strategy appropriate for the research?</li> <li>Were data collected in a way that addressed the research issue?</li> <li>Has the relationship between researcher and participants been considered?</li> <li>Was the data analysis sufficiently rigorous?</li> </ul>                                                                                                              |

Several consensus processes have been used for the development of QIs. The RAND/UCLA Appropriateness Method (RAM) is a formal panel judgement process which systematically and quantitatively combines available scientific evidence with expert opinion by asking panel members to rate, discuss and then re-rate the items of interest.<sup>37</sup> The original RAM was developed in the mid-1980s by the RAND Corporation in collaboration with the University of California Los Angeles (UCLA) as an instrument to facilitate the measurement of medical and surgical intervention appropriateness.<sup>38</sup> RAM has been used extensively as a method of QI development,<sup>8,13,39,40</sup> including QIs to evaluate prehospital care.<sup>7</sup> In accordance with guidelines for conducting RAM,<sup>38</sup> an Australian prehospital care expert panel of seven to 15 members will be recruited. Panellists must have perspectives and areas of expertise in Australian paramedicine, prehospital care, ambulance service

leadership and management, quality improvement, performance/quality measurement and patient perspective. There are eight State/Territory-based ambulance services, one paramedicine professional associations and eighteen universities offering paramedicine programs. These institutions will be contacted and asked to nominate experts for participation in the study. The nomination process will require the nominator making a project information and nomination form available to the nominee for perusal and signature. Self-nomination will be allowed. The completed forms and attached curriculum vitae (CV) will be emailed to the lead investigator. The research team will select expert panel members based on information provided in the forms and attached CV. This is a confidential process and only the researchers will peruse the completed forms and CV. The main selection criteria to be considered will be acknowledged leadership in paramedicine, absence of conflicts of interest and geographic diversity (ideally at least one panellist from each State/Territory). For the purpose of this project, the RAM will be modified in the following ways:

- **Evidence summaries instead of systematic reviews:** As described in the RAM user's manual<sup>38</sup>, the critical review of the literature summarising the best available scientific evidence is a fundamental initial step to inform panel members and as a resource to facilitate resolving any disagreements. The manual suggests that a systematic review is a good way to conduct a RAM literature review.<sup>38</sup> Due to the rigorous methods applied when conducting a full systematic review, however, they can take an extensive amount of time to complete.<sup>41</sup> It is anticipated that it will not be feasible to conduct systematic reviews for all QIs within the time and resources available for this project. Instead, to assist panel members in rating the validity of the QIs, evidence summaries will be compiled as described above for those QIs where published research evidence exists.
- **Opportunity for expert panel members to suggest additional QIs:** In addition to rating the proposed QIs, panel members will also be invited to suggest additional

QIs. This is optional but considered important, especially if expert panel members feel that the proposed QIs do not sufficiently address vital aspects of prehospital care essential for quality measurement in the Australian context.

- **Online rating and discussions instead of a postal rating sheet and face-to-face meeting:** In anticipation of geographically distant locations of potential expert panel members in Australia, the second round will be conducted online. This has been found feasible in other studies using the method amongst geographically distributed participants.<sup>42</sup>

The consensus method will be a two-round online process. The online process will be designed on Qualtrics (Qualtrics, Provo, UT, USA). In round one, panellists will be asked to separately rate the clarity and validity of each QI on scales from 1 to 9. To improve clarity, panellist will have the opportunity to make suggestions on changing the wording of the QIs. Panellists will also have an opportunity to suggest additional QIs, ideally supported by best available evidence. For the assessment of the QIs' validity, panellist will be asked to consider the summarised evidence as well as their own knowledge and experience. In round two, panellists will join an asynchronous online discussion platform (Kialo Inc. Brooklyn, NY USA) moderated by one of the researchers. Discussions will be informed by individualised and anonymised results from the first round consisting of each panellist's own rating compared to the frequency distribution for the ratings, the overall panel median and the mean absolute deviation from the median. Panellists will have an opportunity to discuss each QI before re-rating its validity.

Data analysis will be performed using Microsoft Excel for Mac 2019 (Microsoft Corp., Richmond, WA, USA) and in accordance with the RAM.<sup>38</sup> To proceed to the third and final phase of the project, there needs to be consensus that the QI is valid in the Australian prehospital care context. Validity will be signalled by a final panel median score of greater

1  
2  
3  
4  
5  
6  
7  
8  
9  
10  
11  
12  
13  
14  
15  
16  
17  
18  
19  
20  
21  
22  
23  
24  
25  
26  
27  
28  
29  
30  
31  
32  
33  
34  
35  
36  
37  
38  
39  
40  
41  
42  
43  
44  
45  
46  
47  
48  
49  
50  
51  
52  
53  
54  
55  
56  
57  
58  
59  
60

than or equal to seven with no disagreement. The definition of disagreement will depend on the number of panellists.

**Phase 3: Mixed Methods**

Taking a social science theory perspective informed by reviews and frameworks of acceptability as a criterion for evaluating performance measures,<sup>24,43,44</sup> phase 3 will involve the successional collection of quantitative and qualitative data to facilitate integrated interpretations and conclusions about the acceptability of the candidate QIs. Feasibility and reliability will be investigated in the same fashion. Thus, this phase will see the utilisation of explanatory sequential designs as illustrated in figure 3.

<insert Figure 3 here>

**Figure 3:** Explanatory sequential design of phase 3 (AS: ambulance service)

Target participants for part 1 will be Australian paramedics and ambulance service managers. Based on the Australian registered paramedic population of approximately 17,000,<sup>45</sup> and using a sample size estimation with a confidence interval of 95% and margin of error of 8%, an ideal sample size of 149 will be required for the survey (part 1A). The survey will be disseminated through Australian paramedicine professional associations and social media. Participants will be asked to complete an anonymous online non-validated survey instrument purpose-built for this project (designed on Qualtrics; Qualtrics, Prova, UT, USA). The survey will collect basic demographic data such as gender, age, paramedic qualification, years of experience in paramedicine, employment location, and role. Depending on the number of candidate QIs stemming from phase 2 of the project, the survey will consist of all or a random sample of the QIs. Using a 5-point Likert scale, participants will be asked to rate the acceptability of each QI ranging from very unacceptable to very acceptable. At the end of the survey, participants will be asked if they would like to

1  
2  
3 350 volunteer to partake in the subsequent semi-structured interviews (part 1B). It will be made  
4  
5 351 clear that by participating in part 1B anonymity cannot be maintained. However, information  
6  
7 352 gathered in this part will be kept confidential. If the cohort of self-selected interview  
8  
9 353 participants lacks demographic diversity, purposeful recruitment within the researchers'  
10  
11 354 professional networks will be used in conjunction. Quantitative data analysis will be  
12  
13 355 performed using Microsoft Excel for Mac 2019 (Microsoft Corp., Richmond, WA, USA).  
14  
15 356 Nonparametric procedures, based on the median, as well as distribution free methods such  
16  
17 357 as tabulations, frequencies, contingency tables and chi-squared statistics will be used for  
18  
19 358 analysing these data.<sup>46,47</sup> Analysed data from part 1A will inform the development of a semi-  
20  
21 359 structured interview guide for part 1B. The interview guide will also contain some a priori  
22  
23 360 questions. Questions will be open-ended and aimed at facilitating the explanation of what  
24  
25 361 makes QIs acceptable or unacceptable and how the candidate QIs align to professional  
26  
27 362 standards and values. To ensure diversity in the participants, maximum variation sampling  
28  
29 363 will be used in part 1B.<sup>48,49</sup> This will be achieved by combining self-selected participants with  
30  
31 364 purposeful recruitment of individuals meeting demographic criteria poorly accounted for in  
32  
33 365 the self-selected cohort. Targeted recruitment will be done through the professional  
34  
35 366 networks of the researchers. Interviews will be conducted and qualitative data will be  
36  
37 367 collected until saturation is achieved.<sup>50</sup> Qualitative descriptive analysis will be performed  
38  
39 368 using Nvivo 12 (QRS International, Doncaster, Australia).<sup>51,52</sup>  
40  
41  
42  
43 369  
44  
45 370 For part 2, voluntary participation of Australian State/Territory ambulance services and their  
46  
47 371 quality managers will be sought. The research team will make direct contact with the  
48  
49 372 ambulance services to enquire about interest in participating. There are eight jurisdictional  
50  
51 373 ambulance services in Australia and participation of as many as possible will be pursued.  
52  
53 374 Depending on the number of candidate QIs stemming from phase 2 of the project,  
54  
55 375 participating ambulance services will be asked to pilot all or a random sample of the QIs  
56  
57 376 (part 2A). A questionnaire will collect service-describing data on variables such as size, call  
58  
59 377 volume, data-sets and quality measurement/management/improvement practices, and elicit  
60

1  
2  
3 378 details about the feasibility and reliability of measuring ambulance service performance  
4  
5 379 using the candidate QIs. Quantitative data analysis will be performed using Microsoft Excel  
6  
7 380 for Mac 2019 (Microsoft Corp., Richmond, WA, USA). Summarised results from part 2A will  
8  
9 381 inform the development of a semi-structured interview guide for part 2B. This guide will also  
10  
11 382 contain some a priori questions. Questions will be open-ended and aimed at facilitating the  
12  
13 383 explanation of what makes QIs feasible or unfeasible, especially from a non-technical  
14  
15 384 perspective. Qualitative data will be analysed using NVivo 12 (QRS International, Doncaster,  
16  
17 385 Australia).

18  
19  
20 386  
21  
22 387 **Patient and public involvement**  
23  
24 388 Neither patients nor the public have been involved in the design of this project. The findings  
25  
26 389 of the project will be made available to patients and the general public as part of the  
27  
28 390 dissemination strategy. Future research may evaluate patient and public perceptions of the  
29  
30 391 quality indicators.

31  
32 392  
33  
34 393 **Discussion**  
35  
36 394 Not only is there growing demand for ambulance services but also increasing requirements  
37  
38 395 to improve, maintain and evidence quality of care. QIs are often selected arbitrarily.<sup>19,53</sup> A  
39  
40 396 good QI needs to possess certain attributes which will assure that it can be used to make an  
41  
42 397 accurate and fair judgement about quality. QIs should be valid, acceptable, feasible and  
43  
44 398 reliable and must therefore be assessed or tested for these attributes before implementation.  
45  
46 399 There is growing interest in the measurement of prehospital care quality of ambulance  
47  
48 400 services.<sup>28</sup> Measurement of intelligent and meaningful QIs over time is key to understanding  
49  
50 401 variation and ultimately where and how to conduct improvement efforts.<sup>54</sup> The QIs which will  
51  
52 402 be developed in this project provide a mechanism to appraise Australian ambulance  
53  
54 403 services' performance and a framework to direct, monitor and demonstrate quality  
55  
56 404 improvement efforts.

57  
58  
59  
60 405

There are a number of anticipated real and potential limitations. Firstly, the preliminary scoping review bears inherent and specific limitations. Scoping reviews methods do not include an appraisal of quality or risk of bias when selecting studies for inclusion. The scoping review conducted for this project included articles written in English only and therefore the search performed may not have been exhaustive. Secondly and similarly, rapid reviews also have intrinsic limitations concerning their scope, comprehensiveness and rigor. However, considering the large number of QIs for which evidence needs to be identified and the time it would take to conduct systematic reviews, the rapid review and evidence summary approach is most appropriate. Thirdly, whilst there are clear advantages of conducting online expert panels (e.g. more efficient use of the experts' time and make online discussions anonymous and thus reduce possible biases based on participant status or personality),<sup>42,55</sup> this approach may also potentially present limitations. Unfamiliarity, technical issues or general dislike of online tools could decrease levels of engagement and interactions amongst the expert panel. This may undermine the expert panel members' willingness to participate and affect the quality of discussions and outputs.<sup>56</sup> Lastly, it is unlikely that all Australian State/Territory Ambulance Services will be able or willing to participate in the final phase of the project. These Services have significant differences in aspects such as size, clinical practice, data management, etc., and thus the smaller the number of participating services the less generalisable the results.

## **Ethics and dissemination**

The project will be conducted in accordance with the National Health and Medical Research Council National Statement on Ethical Conduct in Human Research, as well as the approved research proposal. This project has been approved by the University of Adelaide Human Research Ethics Committee (Approval Number H-2017-157). It is supported through an

1  
2  
3  
4  
5  
6  
7  
8  
9  
10  
11  
12  
13  
14  
15  
16  
17  
18  
19  
20  
21  
22  
23  
24  
25  
26  
27  
28  
29  
30  
31  
32  
33  
34  
35  
36  
37  
38  
39  
40  
41  
42  
43  
44  
45  
46  
47  
48  
49  
50  
51  
52  
53  
54  
55  
56  
57  
58  
59  
60

432 Australian Government Research Training Program Scholarship and in part by a research  
433 grant from the Australian and New Zealand College of Paramedicine (ANZCP).  
434  
435 The scoping review has been published. Further findings of the project will be communicated  
436 using a comprehensive dissemination strategy. This strategy includes several different forms  
437 of dissemination to reach out to individuals and stakeholder groups at the national and  
438 international level. More specifically, this will involve publishing in peer-reviewed journals  
439 and presenting at national and international conference presentations, posting on social  
440 media sites such as Twitter, making announcements on the project’s website  
441 (www.aspireproject.net), and e-mailing study findings to participants and appropriate  
442 stakeholders.

## References

1. Donabedian A. An introduction to quality assurance in healthcare. Oxford: Oxford University Press; 2003.
2. Mainz J. Defining and classifying clinical indicators for quality improvement. *Int J Qual Heal Care*. 2003;15(156):523–30.
3. Lowthian JA, Cameron PA, Stoelwinder JU, Curtis A, Currell A, Cooke MW, et al. Increasing utilisation of emergency ambulances. *Aust Heal Rev*. 2011;35(1):63–9.
4. Paramedics Australasia. Paramedicine Role Descriptions [Internet]. Melbourne: Paramedics Australasia; 2012. p. 1–23. Available from: <https://www.paramedics.org>
5. Von Vopelius-Feldt J, Bengner J. Who does what in prehospital critical care? An analysis of competencies of paramedics, critical care paramedics and prehospital physicians. *Emerg Med J*. 2014;31(12):1009–13.
6. Sayre MR, White LJ, Brown LH, Armacost M, Dean JM, Frame SB, et al. The National EMS Research Agenda. *Prehospital Emerg Care*. 2002;6(Suppl 3):1–43.
7. Owen RC. The development and testing of indicators of prehospital care quality [dissertation]. [Manchester]. University of Manchester; 2010.
8. Campbell SM, Braspenning J, Hutchinson A, Marshall M. Research methods used in developing and applying quality indicators in primary care. *Br Med J*. 2003;326:816–9.
9. Lawrence M, Olesen F. Indicators of Quality in Health Care. *Eur J Gen Pract*. 1997;3(9):103–8.
10. Donabedian A. The Quality of Care: How Can It Be Assessed? *J Am Med A*. 1988;260(12):1743–8.
11. Kötter T, Blozik E, Scherer M. Methods for the guideline-based development of quality indicators - a systematic review. *Implement Sci*. 2012;7(1):21.
12. Mainz J. Developing evidence-based clinical indicators: a state of the art methods primer. *Int J Qual Heal Care*. 2003;15(Suppl 1):i5–11.
13. Campbell S, Kontopantelis E, Hannon K, Burke M, Barber A, Lester H. Framework and indicator testing protocol for developing and piloting quality indicators for the UK

- 488 quality and outcomes framework. BMC Fam Pract. 2011;12(1):85.
- 489 14. Krabbe PFM. The Measurement of Health and Health Status: Concepts, Methods and  
 490 Applications from a Multidisciplinary Perspective. San Diego: Elsevier Science &  
 491 Technology; 2016. 380 p.
- 492 15. Delnoij DMJ, Westert GP. Assessing the validity of quality indicators: Keep the  
 493 context in mind! Eur J Public Health. 2012;22(4):452–3.
- 494 16. Lawrence M, Olesen F. Indicators of Quality in Health Care. Eur J Gen Pract.  
 495 2009;3(3):103–8.
- 496 17. Frongillo EA, Baranowski T, Subar AF, Tooze JA, Kirkpatrick SI. Establishing Validity  
 497 and Cross-Context Equivalence of Measures and Indicators. J Acad Nutr Diet.  
 498 2018;1–14.
- 499 18. Marshall MN, Shekelle PG, McGlynn E a, Campbell S, Brook RH, Roland MO. Can  
 500 health care quality indicators be transferred between countries? Qual Saf Health  
 501 Care. 2003;12(1):8–12.
- 502 19. Barr S. Practical Performance Measurement: Using the PuMP Blueprint for Fast, Easy  
 503 and Engaging KPIs. Samford: PuMP Press; 2014. 356 p.
- 504 20. Siriwardena AN, Gillam S. Quality improvement in primary care: The essential guide.  
 505 London: CRC Press, Taylor & Francis Group; 2014. 159 p.
- 506 21. Sollecito WA, Johnson JK. McLaughlin and Kaluzny's Continuous Quality  
 507 Improvement in Health Care. 4th ed. Burlington, MA: Jones & Bartlett Learning; 2013.  
 508 619 p.
- 509 22. Lloyd R. Quality Health Care: A Guide to Developing and Using Indicators. Sudbury,  
 510 MA: Jones and Bartlett; 2004. 343 p.
- 511 23. Mainz J. Quality indicators: Essential for quality improvement. Int J Qual Heal Care.  
 512 2004;16(Suppl. 1):10–1.
- 513 24. Hedge JW, Teachout MS. Exploring the Concept of Acceptability as a Criterion for  
 514 Evaluating Performance Measures. Gr Organ Manag. 2000;25(1):22–44.
- 515 25. Wollersheim H, Hermens R, Hulscher M, Braspenning J, Ouwens M, Schouten J, et

- al. Clinical indicators: Development and applications. *Neth J Med*. 2007;65(1):15–22.
26. American Educational Research Association, American Psychological Association, National Council on Measurement in Education. Standards for Educational and Psychological Testing. Washington, DC: American Educational Research Association; 2014. 230 p.
27. Australian Government Productivity Commission - Steering Committee for the Review of Government Service Provision. Report on Government Services - Chapter 11 (Ambulance Services) [Internet]. Canberra; 2020. Available from: <https://www.pc.gov.au/research/ongoing/report-on-government-services/2019/health/ambulance-services>
28. Pap R, Lockwood C, Stephenson M, Simpson P. Indicators to measure prehospital care quality: a scoping review. *JBIM Database Syst Rev Implement Reports*. 2018;16(11):[ahead of print].
29. Aromataris E, Munn Z, editors. The Joanna Briggs Institute Reviewer's Manual [Internet]. The Joanna Briggs Institute; 2017. Available from: <https://reviewersmanual.joannabriggs.org/>
30. Pap R, Lockwood C, Stephenson M, Simpson P. Indicators to measure pre-hospital care quality: a scoping review protocol. *JBIM Database Syst Rev Implement Reports*. 2017;15(6).
31. Campbell S., Roland M., Buetow S. Defining quality of care. *Soc Sci Med*. 2000;51:1611–25.
32. Munn Z, Lockwood C, Moola S. The Development and Use of Evidence Summaries for Point of Care Information Systems: A Streamlined Rapid Review Approach. *Worldviews Evidence-Based Nurs*. 2015;12(3):131–8.
33. Olausson A, Semple W, Oteir A, Todd P, Williams B. Paramedic literature search filters: Optimised for clinicians and academics. *BMC Med Inform Decis Mak*. 2017;17(1):1–6.
34. Joanna Briggs Institute. The JBI Approach [Internet]. 2017. Available from:

- 544 <http://joannabriggs.org/jbi-approach.html>
- 545 35. Ganann R, Ciliska D, Thomas H. Expediting systematic reviews: methods and  
546 implications of rapid reviews. 2010;1–10.
- 547 36. Wyer P, Rowe B. Evidence-based reviews and databases: are they worth the effort?  
548 Developing evidence summaries for emergency medicine. Acad Emerg Med. 2007  
549 Nov;14(11):960–4.
- 550 37. Nair R, Aggarwal R, Khanna D. Methods of Formal Consensus in  
551 Classification/Diagnostic Criteria and Guideline Development. Semin Arthritis Rheum.  
552 2011;41(2):95–105.
- 553 38. Fitch K, Bernstein SJJ, Aguilar MDD, Burnand B, LaCalle JRR, Lazaro P, et al. The  
554 RAND/UCLA Appropriateness Method User's Manual [Internet]. Transformation.  
555 2001. 109 p. Available from: <http://www.rand.org>
- 556 39. Campbell SM, Braspenning J, Hutchinson A, Marshall MN. Research Methods Used  
557 in Developing and Applying Quality Indicators in Primary Care. Qual Saf Heal Care.  
558 2002;11:358–64.
- 559 40. Campbell SM, Cantrill JA. Consensus methods in prescribing research. J Clin Pharm  
560 Ther. 2001;26:5–14.
- 561 41. Borah R, Brown AW, Capers PL, Kaiser KA. Analysis of the time and workers needed  
562 to conduct systematic reviews of medical interventions using data from the  
563 PROSPERO registry. BMJ Open. 2017;7(2):e012545.
- 564 42. Khodyakov D, Hempel S, Rubenstein L, Shekelle P, Foy R, Salem-Schatz S, et al.  
565 Conducting Online Expert panels: a feasibility and experimental replicability study.  
566 BMC Med Res Methodol. 2011 Dec;11(1):174–82.
- 567 43. Levy PE, Williams JR. The social context of performance appraisal: A review and  
568 framework for the future. J Manage. 2004;30(6):881–905.
- 569 44. Sekhon M, Cartwright M, Francis JJ. Acceptability of healthcare interventions: An  
570 overview of reviews and development of a theoretical framework. BMC Health Serv  
571 Res. 2017;17(1):1–13.

- 1  
2  
3 572 45. Australian Health Practitioner Regulation Agency (AHPRA). Annual Report 2018/19  
4  
5 573 Our National Scheme: For safer healthcare [Internet]. Canberra; 2019. Available from:  
6  
7 574 <https://www.ahpra.gov.au>  
8  
9 575 46. Sullivan GM, Artino AR. Analyzing and Interpreting Data From Likert-Type Scales. J  
10  
11 576 Grad Med Educ. 2013;5(4):541–2.  
12  
13 577 47. Harpe SE. How to analyze Likert and other rating scale data. Curr Pharm Teach  
14  
15 578 Learn. 2015;7(6):836–50.  
16  
17 579 48. Creswell J, Plano Clark V. Designing and conducting mixed methods research. 2nd  
18  
19 580 ed. Los Angeles: Sage Publications Inc.; 2011. 457 p.  
20  
21 581 49. Palinkas LA, Horwitz SM, Green CA, Wisdom JP, Duan N, Hoagwood K. Purposeful  
22  
23 582 Sampling for Qualitative Data Collection and Analysis in Mixed Method  
24  
25 583 Implementation Research. Adm Policy Ment Heal Ment Heal Serv Res.  
26  
27 584 2015;42(5):533–44.  
28  
29 585 50. Saunders B, Sim J, Kingstone T, Baker S, Waterfield J, Bartlam B, et al. Saturation in  
30  
31 586 qualitative research: exploring its conceptualization and operationalization. Qual  
32  
33 587 Quant. 2018;52(4):1893–907.  
34  
35 588 51. Sandelowski M. What's in a name? Qualitative description revisited. Res Nurs Heal.  
36  
37 589 2010;33(1):77–84.  
38  
39 590 52. Sandelowski M. Whatever Happened to Qualitative Description?  
40  
41 591 ResearchinNursing&Health. 2000;23(8):334–40.  
42  
43 592 53. Jones P, Shepherd M, Wells S, Le Fevre J, Ameratunga S. Review article: what  
44  
45 593 makes a good healthcare quality indicator? A systematic review and validation study.  
46  
47 594 Emerg Med Australas. 2014;26(2):113–24.  
48  
49 595 54. Siriwardena N, Gillam S. Measuring for improvement. Qual Prim Care. 2013;21:293–  
50  
51 596 301.  
52  
53 597 55. Bowles KH, Holmes JH, Naylor MD, Liberatore M, Nydick R. Expert consensus for  
54  
55 598 discharge referral decisions using online delphi. AMIA Annu Symp Proc. 2003;106–9.  
56  
57 599 56. Snyder-Halpern R, Thompson CB, Schaffer J. Comparison of mailed vs. Internet

1  
2  
3  
4  
5  
6  
7  
8  
9  
10  
11  
12  
13  
14  
15  
16  
17  
18  
19  
20  
21  
22  
23  
24  
25  
26  
27  
28  
29  
30  
31  
32  
33  
34  
35  
36  
37  
38  
39  
40  
41  
42  
43  
44  
45  
46  
47  
48  
49  
50  
51  
52  
53  
54  
55  
56  
57  
58  
59  
60

600 applications of the Delphi technique in clinical informatics research. Proc AMIA Symp.  
601 2000;809–13.

For peer review only

## **List of abbreviations**

AS: Ambulance Service; CINAHL: Cumulative Index to Nursing and Allied Health Literature;  
CV: Curriculum Vitae; JBI: Joanna Briggs Institute; QI: Quality Indicator; RAM: RAND/UCLA  
Appropriateness Method; RAND Corporation: Research and Development Corporation;  
UCLA: University of California Los Angeles

## **Authors' contributions**

RP is the guarantor. RP inceptioned the project and prepared the manuscript. CL, MS and PS  
reviewed drafts to help refine the manuscript. All authors have read and approved the final  
draft.

## **Funding statement**

This project is supported by an Australian Government Research Training Program  
Scholarship. This project is in part supported by a research grant from the Australian and  
New Zealand College of Paramedicine (ANZCP).

## **Competing interests**

The authors declare that they have no competing interests.

## **Word Count**

4522

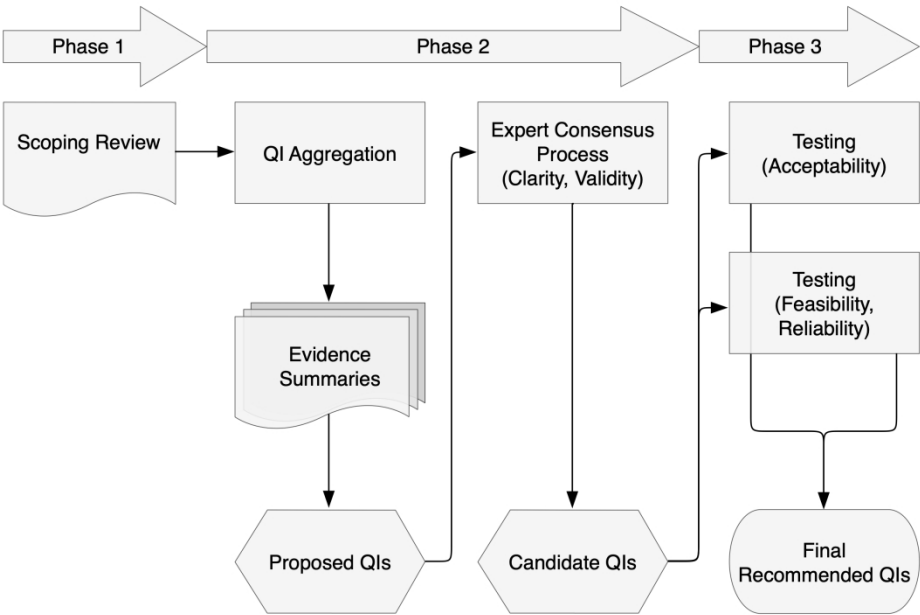

Figure 1: Flow diagram detailing the three phases of the project (QI: quality indicator)

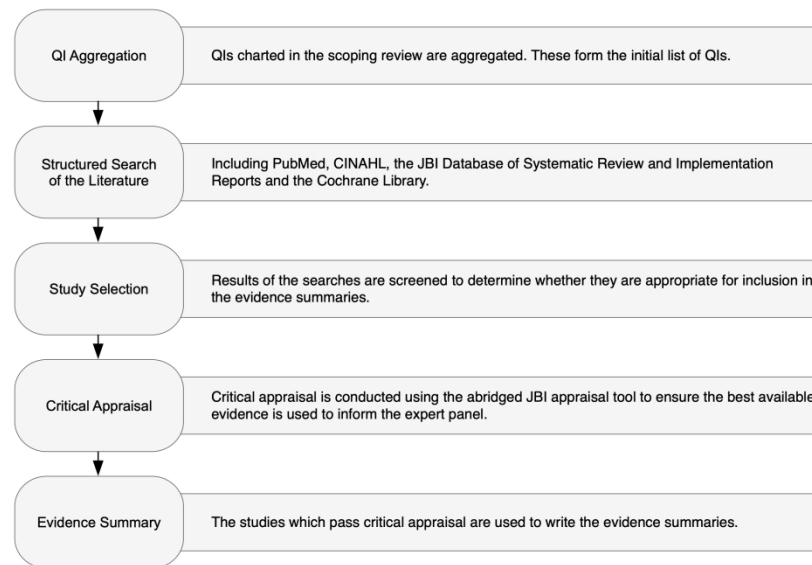

Figure 2: The evidence summary development process (adopted from Munn, Lockwood & Moola, 2015<sup>32</sup>)

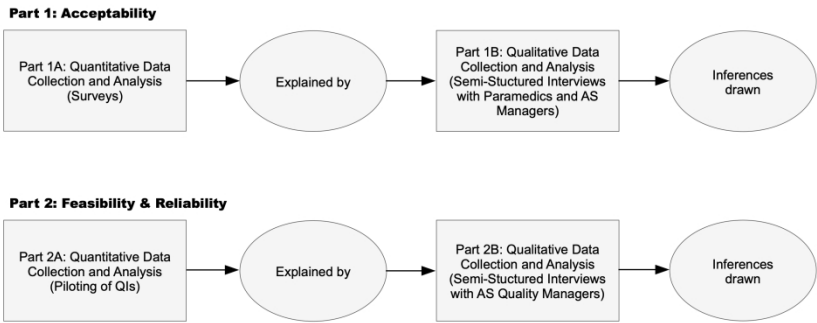

Figure 3: Explanatory sequential design of phase 3 (AS: ambulance service)

# BMJ Open

## The development and testing of Australian prehospital care quality indicators: study protocol

|                                 |                                                                                                                                                                                                                                                                                                        |
|---------------------------------|--------------------------------------------------------------------------------------------------------------------------------------------------------------------------------------------------------------------------------------------------------------------------------------------------------|
| Journal:                        | <i>BMJ Open</i>                                                                                                                                                                                                                                                                                        |
| Manuscript ID                   | bmjopen-2020-038310.R1                                                                                                                                                                                                                                                                                 |
| Article Type:                   | Protocol                                                                                                                                                                                                                                                                                               |
| Date Submitted by the Author:   | 28-Apr-2020                                                                                                                                                                                                                                                                                            |
| Complete List of Authors:       | Pap, Robin; Western Sydney University, School of Science and Health Lockwood, Craig; University of Adelaide, Joanna Briggs Institute Stephenson, Matthew; University of Adelaide, Joanna Briggs Institute Simpson, Paul; Western Sydney University - Campbelltown Campus, School of Science and Health |
| <b>Primary Subject Heading</b>: | Health services research                                                                                                                                                                                                                                                                               |
| Secondary Subject Heading:      | Emergency medicine                                                                                                                                                                                                                                                                                     |
| Keywords:                       | ACCIDENT & EMERGENCY MEDICINE, Quality in health care < HEALTH SERVICES ADMINISTRATION & MANAGEMENT, HEALTH SERVICES ADMINISTRATION & MANAGEMENT                                                                                                                                                       |
|                                 |                                                                                                                                                                                                                                                                                                        |

SCHOLARONE™  
Manuscripts



I, the Submitting Author has the right to grant and does grant on behalf of all authors of the Work (as defined in the below author licence), an exclusive licence and/or a non-exclusive licence for contributions from authors who are: i) UK Crown employees; ii) where BMJ has agreed a CC-BY licence shall apply, and/or iii) in accordance with the terms applicable for US Federal Government officers or employees acting as part of their official duties; on a worldwide, perpetual, irrevocable, royalty-free basis to BMJ Publishing Group Ltd ("BMJ") its licensees and where the relevant Journal is co-owned by BMJ to the co-owners of the Journal, to publish the Work in this journal and any other BMJ products and to exploit all rights, as set out in our [licence](#).

The Submitting Author accepts and understands that any supply made under these terms is made by BMJ to the Submitting Author unless you are acting as an employee on behalf of your employer or a postgraduate student of an affiliated institution which is paying any applicable article publishing charge ("APC") for Open Access articles. Where the Submitting Author wishes to make the Work available on an Open Access basis (and intends to pay the relevant APC), the terms of reuse of such Open Access shall be governed by a Creative Commons licence – details of these licences and which [Creative Commons](#) licence will apply to this Work are set out in our licence referred to above.

Other than as permitted in any relevant BMJ Author's Self Archiving Policies, I confirm this Work has not been accepted for publication elsewhere, is not being considered for publication elsewhere and does not duplicate material already published. I confirm all authors consent to publication of this Work and authorise the granting of this licence.

**The development and testing of Australian prehospital care quality indicators:  
study protocol**

**Robin Pap<sup>1,2\*</sup>, Craig Lockwood<sup>1</sup>, Matthew Stephenson<sup>1</sup>, Paul Simpson<sup>2</sup>**

1. Joanna Briggs Institute, University of Adelaide, Adelaide, Australia

2. School of Science and Health, Western Sydney University, Sydney, Australia

\* Corresponding author

Postal Address: 55 King William Road  
SA 5006 North Adelaide  
Australia

Email: Robin Pap: [r.pap@westernsydney.edu.au](mailto:r.pap@westernsydney.edu.au)

1  
2  
3  
4  
5  
6  
7  
8  
9  
10  
11  
12  
13  
14  
15  
16  
17  
18  
19  
20  
21  
22  
23  
24  
25  
26  
27  
28  
29  
30  
31  
32  
33  
34  
35  
36  
37  
38  
39  
40  
41  
42  
43  
44  
45  
46  
47  
48  
49  
50  
51  
52  
53  
54  
55  
56  
57  
58  
59  
60

**Abstract**

**Introduction** Historically, ambulance services were established to provide rapid transport of patients to hospital. Contemporary prehospital care involves provision of sophisticated ‘mobile healthcare’ to patients across the lifespan presenting with a range of injuries or illnesses of varying acuity. Because of its young age, the paramedicine profession has until recently experienced a lack of research capacity which has led to paucity of a discipline-specific, scientific evidence-base. Therefore, the performance and quality of ambulance services has traditionally been measured using simple, evidence-poor indicators forming a deficient reflection of the true quality of care and providing little direction for quality improvement efforts. This paper reports the study protocol for the development and testing of quality indicators for the Australian prehospital care setting.

**Methods and analysis** This project has three phases. In the first phase, preliminary work in the form of a scoping review was conducted which provided an initial list of quality indicators. In the subsequent phase, these quality indicators will be developed by aggregating them and by performing related rapid reviews. The summarised evidence will be used to support an expert consensus process aimed at optimising the clarity and evaluating the validity of proposed quality indicators. Finally, in the third phase those quality indicators deemed valid will be tested for acceptability, feasibility and reliability using mixed research methods. Evidence-based indicators can facilitate meaningful measurement of the quality of care provided. This forms the first step to identify unwarranted variation and direction for improvement work. This project will develop and test quality indicators for the Australian prehospital care setting.

**Ethics and dissemination** This project has been approved by the University of Adelaide Human Research Ethics Committee. Findings will be disseminated by publications in peer-reviewed journals, presentations at appropriate scientific conferences, as well as posts on social media and on the project’s website.

**Keywords:** Emergency medical services; healthcare quality assessment; prehospital care; quality indicators

### Strengths and limitations of the study

- The scoping review, which was used to establish a preliminary list of prehospital care quality indicators, utilised systematic methods.
- By incorporating systematically synthesised literature into the expert consensus process, it will be evidence informed.
- Selection of an Australian prehospital care expert panel will ensure that validity of proposed quality indicators is evaluated with contextual considerations.
- Testing of candidate quality indicators will involve the participation of paramedics and ambulance services.
- Considering the relatively young age of the paramedicine discipline, the evidence supporting many of the quality indicators is expected to be weak.

1  
2  
3  
4  
5  
6  
7  
8  
9  
10  
11  
12  
13  
14  
15  
16  
17  
18  
19  
20  
21  
22  
23  
24  
25  
26  
27  
28  
29  
30  
31  
32  
33  
34  
35  
36  
37  
38  
39  
40  
41  
42  
43  
44  
45  
46  
47  
48  
49  
50  
51  
52  
53  
54  
55  
56  
57  
58  
59  
60

**Introduction**

The quality and safety of health care is on the agenda in any modern health care organisation, including ambulance services. Strategies to continuously improve the quality of service should primarily be based on information about the level of quality produced by the health care organisation.<sup>1</sup> Indicators of desirable structures, processes and outcomes allow the quality of care and services to be measured. This assessment can be facilitated by systematically developing quality indicators that describe the performance that should occur, and then measuring and monitoring whether a service’s operations and patient care are consistent with these indicators.<sup>2</sup> Thus, an indicator may be defined as an explicitly defined and measurable element of health care services and, as far as possible, should possess the fundamental characteristics of clarity, validity, acceptability, feasibility and reliability.<sup>3</sup> A *quality* indicator (QI) is an indicator for which there is evidence or consensus that it can be used to assess the quality, and hence measure changes in quality over time.<sup>4</sup>

For the purpose of this project, the context of prehospital care is limited to the health care services provided by ambulance services. Historically, the function of ambulance services was primarily one of transport; paramedics would provide only stabilising care to patients with high-acuity presentations before transporting to an emergency department. However, ambulance service models of care have evolved considerably. Contemporary prehospital care involves provision of often complex ‘mobile healthcare’ to patients across the lifespan presenting with injury or illness across the spectrum of acuity. An increasingly aged population and an increased incidence of chronic disease have led to a substantial increase in non-emergency, or ‘low acuity’ presentations for whom the traditional emergency department disposition may not be most appropriate.<sup>5,6</sup> Ambulance services now play a key role in integrated health care frameworks, with transport to an emergency department being one of many disposition outcomes following care from paramedics alongside referral into primary and community-based health care. On the other verge of the patient spectrum, ambulance services continue to provide critical care and transport for those suffering life-

threatening illness or injury.<sup>6,7</sup> Therefore, this project adopts the definition of prehospital care previously developed which encompasses this range of patients seen by ambulance services: Prehospital care is the care that ambulance services provide for patients with real or perceived emergency or urgent care needs from the time point of emergency telephone access until care is concluded or until arrival and transfer of care to a hospital or other health care facility.<sup>8,9</sup>

Similarly to many other countries, Australia has measures in its national performance indicator framework for ambulance services that track the quality of care delivered to its residents across the various jurisdictions.<sup>10</sup> However, the scope of current measurement is limited. For example, a short response time interval may be an important indicator in certain, time-critical patient cohorts,<sup>11–13</sup> however, its validity as a holistic prehospital care quality indicator is questionable.<sup>14,15</sup> Response times and other, similarly simple quality indicators have predominated in ambulance services' performance reports since they are easily measured and readily understood by the public and policymakers alike.<sup>16</sup> With increasing research activity and the recent commencement of national registration of paramedics in Australia, a timely need to expand the nationally utilised indicators of prehospital care quality exists. Both, an expanding evidence-base and regulations which primarily ensure patient and community safety, ultimately aim to protect and continuously improve the quality of prehospital care. Meaningful measurement based on systematically developed QIs not only produces data to ensure the maintenance of quality, it also provides information on whether or not change is effective in achieving improvement.

This paper reports the context and methods for a project on development and testing of prehospital care QIs. The primary aim of the project is to develop and test QIs for the Australian prehospital care setting. To achieve this, the project addresses the following objectives:

1. To map the attributes or dimensions of ‘quality’ in the context of prehospital care and explore indicators that have been developed internationally to measure prehospital care quality.
2. To develop prehospital care QIs for the Australian setting and to evaluate their validity.
3. To test selected candidate prehospital care QIs for acceptability, feasibility and reliability.

**Methods and analysis**

This project consists of three phases (figure 1): An initial scoping review addressing objective 1; Evidence-informed development of prehospital care QIs and an evaluation of their validity using an expert consensus process (modified RAND/UCLA Appropriateness Method) to address objective 2; And finally a mixed methods approach (explanatory sequential design) to test the QIs as detailed in objective 3.

<insert Figure 1 here>

**Figure 1:** Flow diagram detailing the three phases of the project (QI: quality indicator)

**Phase 1: Scoping Review**

This phase has been completed and involved preparatory work in the form of a scoping review.<sup>17</sup> The purpose of the review was to map the attributes of ‘quality’ in the context of prehospital care and to chart existing international prehospital care QIs. The review employed the Joanna Briggs Institute (JBI) methodology for conducting scoping reviews.<sup>18</sup> The objectives, inclusion and exclusion criteria, and methods were specified in advance and documented in a protocol.<sup>19</sup>

The review's systematic search confirmed paucity in literature that defines prehospital care quality or examines which dimensions of generic health care quality definitions are important in prehospital care. However, synthesis of included articles suggested that timely access to appropriate, safe and effective care which is responsive to a patient's needs and efficient and equitable to populations is reflective of high-quality prehospital care. There is growing interest in developing QIs to evaluate prehospital care. In total, the review charted 526 QIs addressing clinical and non-clinical aspects of ambulance services providing prehospital care. The scoping review highlighted the need for validation of existing prehospital care QIs and *de novo* QI development.

## **Phase 2: Evidence-Informed Expert Consensus Process**

Phase 2 will comprise an evidence-informed expert consensus process to optimise the clarity of QIs and evaluate which are valid for the measurement of prehospital care quality in Australia. Preparative work will involve aggregating the dimensions of prehospital care quality and the prehospital care QIs charted in phase 1, as well as performing evidence summaries to inform the expert panel. There are practical advantages, including the critical appraisal of QIs, in aggregating multiple dimensions of quality into a smaller number of principal dimensions.<sup>20</sup> Campbell and colleagues (2000)<sup>20</sup> argue that there are two overarching dimensions of quality of care; access and effectiveness. Aggregation of attributes of prehospital care quality into these two key dimensions has previously been performed by Owen (2010).<sup>9</sup>

The development of the evidence summaries to inform the expert panel of best available evidence for each QI will be guided by the JBI approach for rapid reviews and evidence summaries.<sup>21</sup> Figure 2 provides a diagrammatic outline of the rapid review and evidence summary process.

1  
2  
3 190 <insert Figure 2 here>  
4  
5 191 **Figure 2:** The evidence summary development process (adopted from Munn, Lockwood &  
6  
7 192 Moola, 2015<sup>21</sup>)  
8  
9 193  
10  
11 194 Literature searches will be undertaken in the following databases: PubMed, CINAHL, the JBI  
12  
13 195 Database of Systematic Reviews and Implementation Reports and the Cochrane Library.  
14  
15 196 Table 1 details an example of search terms used. Generally, terms related to prehospital  
16  
17 197 care will be combined with QI specific terms. Development of the terms related to  
18  
19 198 prehospital care will be guided by search filters created by Olausson, et al.<sup>22</sup> Only English  
20  
21 199 language papers will be included for pragmatic reasons. Searches will not be limited by date.  
22  
23 200 The search will also include backtracking of references. In line with JBI's approach to  
24  
25 201 evidence summaries,<sup>21,23</sup> the best available evidence will be incorporated in each summary.  
26  
27 202 This means that lower-level evidence will be included only when no systematic reviews are  
28  
29 203 located. The JBI levels of evidence are detailed in Table 2.  
30  
31 204  
32  
33  
34 205 **Table 1** Example of search terms/filters used in PubMed  
35  
36  
37  
38  
39  
40  
41  
42  
43  
44  
45  
46  
47  
48 206  
49  
50 207 Following the search, titles and abstracts will be screened. If potentially eligible, the full text  
51  
52 208 of the papers will be read to determine whether the article should be included in the  
53  
54 209 applicable evidence summary. Full-text reading will involve an assessment of internal validity  
55  
56 210 utilising an abridged critical appraisal tool (Table 3). The rapid reviews and evidence  
57  
58 211 summaries that will be developed for this study will have several limitations. The more a  
59  
60

rapid review adheres to the methodological rigor of systematic reviews, the longer it will take to complete.<sup>21,24,25</sup> Therefore, the less time is taken to complete a rapid review the less thorough it will be. The JBI approach to evidence summaries aims for a rapid development cycle.<sup>21</sup> This method is considered suitable for the purpose of this project considering the limited resources and time available. These restrictions also mean that there will be only one researcher to screen, select, appraise and summarise the evidence and no peer review will be undertaken which may inevitable introduce increased risk of bias and error.

**Table 2** JBI Levels of Evidence for Effectiveness, Diagnosis and Meaningfulness<sup>23</sup> (JBI: Joanna Briggs Institute)

| Level of Evidence | Study Designs                                                                                                                                                                                                                                                                                          |                                                                                                                                                                                                         |                                                |
|-------------------|--------------------------------------------------------------------------------------------------------------------------------------------------------------------------------------------------------------------------------------------------------------------------------------------------------|---------------------------------------------------------------------------------------------------------------------------------------------------------------------------------------------------------|------------------------------------------------|
|                   | Effectiveness                                                                                                                                                                                                                                                                                          | Diagnosis                                                                                                                                                                                               | Meaningfulness                                 |
| <b>1</b>          | Experimental Designs including:<br>a. Systematic review of Randomized Controlled Trials (RCTs)<br>b. Systematic review of RCTs and other study designs<br>c. RCTs<br>d. Pseudo-RCTs                                                                                                                    | Studies of test accuracy among consecutive patients:<br>a. Systematic review of studies of test accuracy among consecutive patients<br>b. Study of test accuracy among consecutive patients             | Qualitative or mixed-methods systematic review |
| <b>2</b>          | Quasi-Experimental Designs including:<br>a. Systematic review of quasi-experimental studies<br>b. Systematic review of quasi-experimental and other lower study designs<br>c. Quasi-experimental prospectively controlled study<br>d. Pre-test post-test or historic/retrospective control group study | Studies of Test Accuracy among non-consecutive patients:<br>a. Systematic review of studies of test accuracy among non-consecutive patients<br>b. Study of test accuracy among non-consecutive patients | Qualitative or mixed-methods synthesis         |
| <b>3</b>          | Observational – Analytic Designs including:<br>a. Systematic review of comparable cohort studies<br>b. Systematic review of comparable cohort and other lower study designs<br>c. Cohort study with control group<br>d. Case-controlled study<br>e. Observational study without a control group        | Diagnostic Case control studies:<br>a. Systematic review of diagnostic case control studies<br>b. Diagnostic case-control study                                                                         | Single qualitative study                       |
| <b>4</b>          | Observational – Descriptive Designs including:<br>a. Systematic review of descriptive studies<br>b. Cross-sectional study<br>c. Case series<br>d. Case study                                                                                                                                           | Diagnostic yield studies:<br>a. Systematic review of diagnostic yield studies<br>b. Individual diagnostic yield study                                                                                   | Systematic review of expert opinion            |
| <b>5</b>          | Expert Opinion and Bench Research including:                                                                                                                                                                                                                                                           | Expert Opinion and Bench Research:                                                                                                                                                                      | Expert opinion                                 |

|  |                                                                                                          |                                                                                                           |  |
|--|----------------------------------------------------------------------------------------------------------|-----------------------------------------------------------------------------------------------------------|--|
|  | a. Systematic review of expert opinion<br>b. Expert consensus<br>c. Bench research/single expert opinion | a. Systematic review of expert opinion<br>b. Expert consensus<br>c. Bench research/ single expert opinion |  |
|--|----------------------------------------------------------------------------------------------------------|-----------------------------------------------------------------------------------------------------------|--|

**Table 3** Abridged Quality Appraisal Criteria for JBI Evidence Summaries<sup>21</sup> (JBI: Joanna Briggs Institute)

| Type of Study/Evidence       | Quality Appraisal Criteria                                                                                                                                                                                                                                                                                                                                                                                                                                                                                       |
|------------------------------|------------------------------------------------------------------------------------------------------------------------------------------------------------------------------------------------------------------------------------------------------------------------------------------------------------------------------------------------------------------------------------------------------------------------------------------------------------------------------------------------------------------|
| <b>Systematic Review</b>     | <ul style="list-style-type: none"><li>• Is the review question clearly and explicitly stated?</li><li>• Was the search strategy appropriate?</li><li>• Were the inclusion criteria appropriate for the review question?</li><li>• Were the criteria for appraising studies appropriate?</li><li>• Was critical appraisal by two or more independent reviewers?</li><li>• Were there methods used to minimize error in data extraction?</li><li>• Were the methods used to combine studies appropriate?</li></ul> |
| <b>Quantitative Evidence</b> | <ul style="list-style-type: none"><li>• Was there appropriate randomization?</li><li>• Was allocation concealed?</li><li>• Was blinding to allocation maintained?</li><li>• Was incompleteness of data addressed?</li><li>• Were outcomes reported accurately?</li></ul>                                                                                                                                                                                                                                         |
| <b>Qualitative Evidence</b>  | <ul style="list-style-type: none"><li>• Was the research design appropriate for the research?</li><li>• Was the recruitment strategy appropriate for the research?</li><li>• Were data collected in a way that addressed the research issue?</li><li>• Has the relationship between researcher and participants been considered?</li><li>• Was the data analysis sufficiently rigorous?</li></ul>                                                                                                                |

An Australian prehospital care expert panel of seven to 15 members will be recruited. Panellists must have perspectives and areas of expertise in Australian paramedicine, prehospital care, ambulance service leadership and management, quality improvement, performance/quality measurement and patient perspective. There are eight State/Territory-based ambulance services, one paramedicine professional associations and eighteen universities offering paramedicine programs. These institutions will be contacted and asked to nominate experts for participation in the study. The nomination process will require the nominator making a project information and nomination form available to the nominee for perusal and signature. Self-nomination will be allowed. The completed forms and attached curriculum vitae (CV) will be emailed to the lead investigator. The research team will select expert panel members based on information provided in the forms and attached CV. This is a confidential process and only the researchers will peruse the completed forms and CV.

The main selection criteria to be considered will be acknowledged leadership in paramedicine, absence of conflicts of interest and geographic diversity (ideally at least one panellist from each State/Territory). A RAND/UCLA Appropriateness Method (RAM) will be applied. RAM is a formal panel judgement process which systematically and quantitatively combines available scientific evidence with expert opinion by asking panel members to rate, discuss and then re-rate the items of interest.<sup>26</sup> For the purpose of this project the original method will be modified in the following ways:

- **Evidence summaries instead of systematic reviews:** As described in the RAM user's manual<sup>27</sup>, the critical review of the literature summarising the best available scientific evidence is a fundamental initial step to inform panel members and as a resource to facilitate resolving any disagreements. The manual suggests that a systematic review is a good way to conduct a RAM literature review.<sup>27</sup> Due to the rigorous methods applied when conducting a full systematic review, however, they can take an extensive amount of time to complete.<sup>28</sup> It is anticipated that it will not be feasible to conduct systematic reviews for all QIs within the time and resources available for this project. Instead, to assist panel members in rating the validity of the QIs, evidence summaries will be compiled as described above for those QIs where published research evidence exists.
- **Opportunity for expert panel members to suggest additional QIs:** In addition to rating the proposed QIs, panel members will also be invited to suggest additional QIs. This is optional but considered important, especially if expert panel members feel that the proposed QIs do not sufficiently address vital aspects of prehospital care essential for quality measurement in the Australian context.
- **Online rating and discussions instead of a postal rating sheet and face-to-face meeting:** In anticipation of geographically distant locations of potential expert panel members in Australia, the second round will be conducted online. This has been

found feasible in other studies using the method amongst geographically distributed participants.<sup>29</sup>

The consensus method will be a two-round online process. The online process will be designed on Qualtrics (Qualtrics, Provo, UT, USA). In round one, panellists will be asked to separately rate the clarity and validity of each QI on scales from 1 to 9. To improve clarity, panellist will have the opportunity to make suggestions on changing the wording of the QIs. Panellists will also have an opportunity to suggest additional QIs, ideally supported by best available evidence. For the assessment of the QIs' validity, panellist will be asked to consider the summarised evidence as well as their own knowledge and experience. In round two, panellists will join an asynchronous online discussion platform (Kialo Inc. Brooklyn, NY USA) moderated by one of the researchers. Discussions will be informed by individualised and anonymised results from the first round consisting of each panellist's own rating compared to the frequency distribution for the ratings, the overall panel median and the mean absolute deviation from the median. Panellists will have an opportunity to discuss each QI before re-rating its validity.

Data analysis will be performed using Microsoft Excel for Mac 2019 (Microsoft Corp., Richmond, WA, USA) and in accordance with the RAM.<sup>27</sup> To proceed to the third and final phase of the project, there needs to be consensus that the QI is valid in the Australian prehospital care context. Validity will be signalled by a final panel median score of greater than or equal to seven with no disagreement. The definition of disagreement will depend on the number of panellists.

### **Phase 3: Mixed Methods**

In this final phase, focus will be shifted from evaluating which QIs are valid to assessing which QIs are useful. As such, this phase is based on pragmatism as a philosophical foundation.<sup>30</sup> Taking a social science theory perspective informed by reviews and

frameworks of acceptability as a criterion for evaluating performance measures,<sup>31–33</sup> phase 3 will involve the successional collection of quantitative and qualitative data to facilitate integrated interpretations and conclusions about the acceptability of the candidate QIs. Feasibility and reliability will be investigated in the same fashion. Thus, this phase will see the utilisation of explanatory sequential designs as illustrated in figure 3. The choice of mixed methods is in line with broad consensus that the rationale for a mixed approach must be a pragmatic one.<sup>34</sup>

<insert Figure 3 here>

**Figure 3:** Explanatory sequential design of phase 3 (AS: ambulance service)

Target participants for part 1 will be Australian paramedics and ambulance service managers, the individuals and representatives of services whose quality of prehospital care would be measured after implementation of the QIs. Based on the Australian registered paramedic population of approximately 17,000,<sup>35</sup> and using a sample size estimation with a confidence interval of 95% and margin of error of 8%, an ideal sample size of 149 will be required for the survey (part 1A). The survey will be disseminated through Australian paramedicine professional associations and social media. Participants will be asked to complete an anonymous online non-validated survey instrument purpose-built for this project (designed on Qualtrics; Qualtrics, Provo, UT, USA). The survey will collect basic demographic data such as gender, age, paramedic qualification, years of experience in paramedicine, employment location, and role. Depending on the number of candidate QIs stemming from phase 2 of the project, the survey will consist of all or a random sample of the QIs. Using a 5-point Likert scale, participants will be asked to rate the acceptability of each QI ranging from very unacceptable to very acceptable. At the end of the survey, participants will be asked if they would like to volunteer to partake in the subsequent semi-structured interviews (part 1B). It will be made clear that by participating in part 1B anonymity cannot be maintained. However, information gathered in this part will be kept

1  
2  
3 322 confidential. If the cohort of self-selected interview participants lacks demographic diversity,  
4  
5 323 purposeful recruitment within the researchers' professional networks will be used in  
6  
7 324 conjunction. Quantitative data analysis will be performed using Microsoft Excel for Mac 2019  
8  
9 325 (Microsoft Corp., Richmond, WA, USA). Nonparametric procedures, based on the median,  
10  
11 326 as well as distribution free methods such as tabulations, frequencies, contingency tables and  
12  
13 327 chi-squared statistics will be used for analysing these data.<sup>36,37</sup> Analysed data from part 1A  
14  
15 328 will inform the development of a semi-structured interview guide for part 1B. The interview  
16  
17 329 guide will also contain some *a priori* questions (Box 1). Questions will be open-ended and  
18  
19 330 aimed at facilitating the explanation of what makes QIs acceptable or unacceptable and how  
20  
21 331 the candidate QIs align to professional standards and values. To ensure diversity in the  
22  
23 332 participants and to optimise credibility of results, maximum variation sampling will be used in  
24  
25 333 part 1B.<sup>38,39</sup> This will be achieved by combining self-selected participants with purposeful  
26  
27 334 recruitment of individuals meeting demographic criteria poorly accounted for in the self-  
28  
29 335 selected cohort. Targeted recruitment will be done through the professional networks of the  
30  
31 336 researchers. Interviews will be conducted in English by the principle investigator (RP) and  
32  
33 337 recorded for transcription. During and immediately after field notes will be taken. Qualitative  
34  
35 338 data will be collected until saturation is achieved,<sup>40</sup> and descriptive approaches will be taken  
36  
37 339 by conducting content analyses using Nvivo 12 (QRS International, Doncaster,  
38  
39 340 Australia).<sup>41,42</sup> This will involve disassembling the data thorough coding, reassembling the  
40  
41 341 coded data by putting it into context with each other to create categories and ultimately  
42  
43 342 themes, and finally interpreting the data thereby drawing analytical conclusions.<sup>43,44</sup> Several  
44  
45 343 techniques will be used to enhance trustworthiness; these will include prolonged  
46  
47 344 engagement, triangulation of recorded interviews, transcripts and field notes, and member  
48  
49 345 checking.<sup>45</sup>  
50  
51  
52  
53  
54  
55

56 347 **Box 1** Questions set *a priori* in the interview guide for phase 3, part 1B  
57

|    |                                                                                           |
|----|-------------------------------------------------------------------------------------------|
| 58 | <b>Opening:</b>                                                                           |
| 59 | 1. How long have you been involved in the ambulance service and what roles have you held? |
| 60 | <b>Transition:</b>                                                                        |
|    | 2. What makes a quality indicator acceptable or not acceptable?                           |

**Key:**

3. How acceptable did you find the quality indicators in general?
4. How well do you think the quality indicators align to professional standards and values?
5. Clinician: Would you agree for your clinical practice to be measured and evaluated using these quality indicators?  
Manager/Supervisor: Would you agree to measure and evaluate the clinical practice of the staff you are supervising by using these quality indicators?

**Closing:**

6. Is there anything you would like to add?
7. Do you have any questions about the interview or the research?

348

349

350 For part 2, voluntary participation of Australian State/Territory ambulance services and their

351 quality managers will be sought. The research team will make direct contact with the

352 ambulance services to enquire about interest in participating. There are eight jurisdictional

353 ambulance services in Australia and participation of as many as possible will be pursued.

354 Depending on the number of candidate QIs stemming from phase 2 of the project,

355 participating ambulance services will be asked to pilot all or a random sample of the QIs

356 (part 2A). A questionnaire will collect service-describing data on variables such as size, call

357 volume, data-sets and quality measurement/management/improvement practices, and elicit

358 details about the feasibility and reliability of measuring ambulance service performance

359 using the candidate QIs. Quantitative data analysis will be performed using Microsoft Excel

360 for Mac 2019 (Microsoft Corp., Richmond, WA, USA). Similar to part 1, summarised results

361 from part 2A will inform the development of a semi-structured interview guide for part 2B.

362 This guide will also contain some a priori questions (Box 2). Questions will be open-ended

363 and aimed at facilitating the explanation of what makes QIs feasible or unfeasible, especially

364 from a non-technical perspective. Data collection during the interviews and subsequent

365 processing and analysis will be conducted using the same approach described for part 1

366 above.

367

368 **Box 2** Questions set *a priori* in the interview guide for phase 3, part 2B

**In relation to specific QIs:**

1. Do you think the target population is well described?
2. Is the numerator and denominator sufficiently defined?
3. Are the exclusions clear?
4. [In the pilot results form, it was indicated that IT/software is insufficient. What would need to be done to upgrade the system/software? Are there any barriers to this?]

5. [In the pilot results form, it was indicated that data is not available from existing sources. What would need to be done to obtain the required data? Are there any barriers to this?]

6. Is the data consistent with repeated measurements?

7. Do you think the indicator measures an aspect of your Service that occurs often enough to detect clinically (or other) important changes?

8. [In the pilot results form, it was indicated that piloting the indicator was not successful in producing an accurate reflection of (Ambulance Service name) performance. What made the results unreliable/imprecise? What would need to be changed to make it reliable/precise?]

9. Are the results understandable?

10. Do you believe using this indicator as a quality improvement tool induces risk of data manipulation?

Closing

1. Is there anything you would like to add?

2. Do you have any questions about the interview or the research?

**Patient and public involvement**

Neither patients nor the public have been involved in the design of this project. The findings of the project will be made available to patients and the general public as part of the dissemination strategy. Future research may evaluate patient and public perceptions of the quality indicators.

**Discussion**

Not only is there rising demand for ambulance services but also increasing requirements to improve, maintain and evidence quality of care. QIs are often selected arbitrarily,<sup>46,47</sup> however, there appears to be growing interest in finding better ways to measure the quality of prehospital care provided by ambulance services.<sup>17</sup> Measurement using intelligent and meaningful QIs over time is key to understanding variation and ultimately where and how to conduct improvement efforts.<sup>48</sup> The QIs which will be developed in this project provide a mechanism to appraise Australian ambulance services' performance and a framework to direct, monitor and demonstrate quality improvement efforts. Essential for the development of QIs is a definition of quality. Proceeding to develop indicators for the measurement of quality without understanding and consensus on what the concept of quality entails is unlikely to result in meaningful assessment of quality.<sup>49</sup> Indicators can be developed using non-systematic and systematic methods.<sup>3</sup> Non-systematic methods are relatively quick; however, they tend not to incorporate all available evidence during their development.

391 Systematically developed QIs are ideally based on high-level scientific evidence or they are  
392 derived from evidence-informed guidelines.<sup>3,50</sup> In areas or disciplines with limited scientific  
393 evidence, such as paramedicine, it may be necessary to combine the available evidence  
394 with expert consensus.<sup>51</sup>  
395  
396 A good QI needs to possess certain attributes which will assure that it can be used to make  
397 an accurate and fair judgement about quality. QIs should be valid, acceptable, feasible and  
398 reliable and must therefore be assessed or tested for these attributes before implementation.  
399 A good quality indicator also has clear meaning which enables what is being assessed to be  
400 precisely attributable to that indicator.<sup>3,52</sup> In other words, a clear QI is one which is free of  
401 ambiguity, inaccuracy or imprecision. Validity is arguably the most important property of a  
402 quality indicator. In science, validity refers to the degree to which evidence and theory  
403 support the interpretation of scores entailed by proposed uses of an instrument.<sup>53</sup> Thus, in  
404 the quality measurement context, validity refers to the degree to which evidence and theory  
405 support the expected interpretation of measured elements of practice performance related to  
406 the quality indicators. In more simple terms, validity refers to the extent to which the given  
407 statement represents high-quality care and would therefore be an endorsed indicator of  
408 quality. When assessing the validity of QIs, careful consideration of the intended context is  
409 important.<sup>54–56</sup> Whilst there are considerable benefits in using work from other locations, QIs  
410 cannot simply be transferred directly between different settings without an intermediate  
411 process to allow for variation in professional culture and clinical practice.<sup>57</sup> As such, rating  
412 the validity of QIs entails as much assessment of whether they represent high-quality care  
413 as it does of how contextually applicable they are. Therefore, a method of group consensus  
414 using current scientific evidence in conjunction with Australian expert opinion to develop the  
415 clarity and assess the contextual validity of proposed QIs is thus deemed to be the approach  
416 of choice for this particular phase of the project. Several consensus processes have been  
417 used for the development of QIs. The original RAM was developed in the mid-1980s by the  
418 RAND Corporation in collaboration with the University of California Los Angeles (UCLA) as

1  
2  
3  
4  
5  
6  
7  
8  
9  
10  
11  
12  
13  
14  
15  
16  
17  
18  
19  
20  
21  
22  
23  
24  
25  
26  
27  
28  
29  
30  
31  
32  
33  
34  
35  
36  
37  
38  
39  
40  
41  
42  
43  
44  
45  
46  
47  
48  
49  
50  
51  
52  
53  
54  
55  
56  
57  
58  
59  
60

an instrument to facilitate the measurement of medical and surgical intervention appropriateness.<sup>27</sup> RAM has been used extensively as a method of QI development,<sup>3,52,58,59</sup> including QIs to evaluate prehospital care.<sup>9</sup>

Acceptability refers to the quality of being satisfactory or agreeable in terms of professional standards and values. If the aim of measurement is to provide direction for quality improvement, then the quality indicators need to be interpretable and meaningful to the audience, i.e. clinicians and managers. However, the benefit of assessing quality indicators for acceptability extends beyond their development and testing. Measurement provides information to direct improvement efforts and is thus central to quality improvement.<sup>3,47,60–63</sup> Involvement of clinicians and managers in the development of indicators is likely to improve their uptake and contributes to sustainability in quality improvement.<sup>32</sup> Measurement of the quality of care may also serve as or contribute to performance appraisal systems. In this instance, user acceptance of such systems may be a critical criterion to ensure the successful implementation.<sup>32</sup> Feasibility and reliability relate to the measurability of a QI. Testing QIs for these attributes is critical and ensures that implementation and sustained measurement is successful. Feasibility relates to the availability or attainability of accurate data and whether this data is realistically collectable.<sup>52</sup> Feasibility thus encompasses technical and non-technical aspects of data collection and analysis. A feasible QI also facilitates measurement which is applicable to quality improvement, sensitive to improvement over time and useful for decision-making.<sup>64</sup> Reliability, in this instance, is closely related to precision and refers to the consistency of scores across replications of a testing procedure.<sup>65</sup> Testing reliability intends to assess whether the QIs are non-erroneously reproducible and for any errors to be identified.<sup>52</sup> A reliable QI facilitates measurement which has low inter- or intra-rater variation and suitable for statistical analyses.<sup>64</sup>

446 To test if and to what extent the QIs are acceptable, feasible and reliable, a mixed methods  
447 approach will be used. The reason for mixing both types of data is that neither quantitative  
448 nor qualitative methods alone would suffice to adequately capture the complex issue of QI  
449 acceptability, feasibility and reliability. Combined, quantitative and qualitative methods can  
450 complement each other and thus provide a more comprehensive picture of a research  
451 problem.<sup>66</sup> More specifically, by applying a sequential explanatory mixed methods design,  
452 quantitative data and results will provide a general initial outline of how acceptable, feasible  
453 and reliable the QIs are, while the subsequent qualitative data and its analysis will explain  
454 those statistical results by exploring the participants' views regarding the QIs in more depth.  
455 Although results of the quantitative and qualitative aspects will be integrated, priority will be  
456 given to the quantitative or the qualitative side during the analysis depending on which  
457 aspect is expected to require more emphasis.<sup>67</sup> Therefore, in part 1 (acceptability) more  
458 emphasis will be placed on the qualitative component to thoroughly understand why certain  
459 QIs are deemed acceptable or not acceptable. Whilst part 2 (feasibility and reliability) will  
460 require more focus on the quantitative aspect, non-technical facilitators and barriers to  
461 feasibility will be explained through data analysis of the information obtained from  
462 participants.

463  
464 There are a number of anticipated real and potential limitations. Firstly, the preliminary  
465 scoping review bears inherent and specific limitations. Scoping reviews methods do not  
466 include an appraisal of quality or risk of bias when selecting studies for inclusion. The  
467 scoping review conducted for this project included articles written in English only and  
468 therefore the search performed may not have been exhaustive. Secondly and similarly, rapid  
469 reviews also have intrinsic limitations concerning their scope, comprehensiveness and rigor.  
470 However, considering the large number of QIs for which evidence needs to be identified and  
471 the time it would take to conduct systematic reviews, the rapid review and evidence  
472 summary approach is most appropriate. Thirdly, whilst there are clear advantages of  
473 conducting online expert panels (e.g. more efficient use of the experts' time and make online

discussions anonymous and thus reduce possible biases based on participant status or personality),<sup>29,68</sup> this approach may also potentially present limitations. Unfamiliarity, technical issues or general dislike of online tools could decrease levels of engagement and interactions amongst the expert panel. This may undermine the expert panel members' willingness to participate and affect the quality of discussions and outputs.<sup>69</sup> Lastly, it is unlikely that all Australian State/Territory Ambulance Services will be able or willing to participate in the final phase of the project. These Services have significant differences in aspects such as size, clinical practice, data management, etc., and thus the smaller the number of participating services the less generalisable the results.

483

#### 484 **Ethics and dissemination**

The project will be conducted in accordance with the National Health and Medical Research Council National Statement on Ethical Conduct in Human Research, as well as the approved research proposal. This project has been approved by the University of Adelaide Human Research Ethics Committee (Approval Number H-2017-157). It is supported through an Australian Government Research Training Program Scholarship and in part by a research grant from the Australian and New Zealand College of Paramedicine (ANZCP).

491

The scoping review has been published.<sup>17</sup> Further findings of the project will be communicated using a comprehensive dissemination strategy. This strategy includes several different forms of dissemination to reach out to individuals and stakeholder groups at the national and international level. More specifically, this will involve publishing in peer-reviewed journals and presenting at national and international conference presentations, posting on social media sites such as Twitter, making announcements on the project's website ([www.aspireproject.net](http://www.aspireproject.net)), and e-mailing study findings to participants and appropriate stakeholders.

500

## References

1. Donabedian A. An introduction to quality assurance in healthcare. Oxford: Oxford University Press; 2003.
2. Mainz J. Defining and classifying clinical indicators for quality improvement. *Int J Qual Heal Care*. 2003;15(156):523–30.
3. Campbell SM, Braspenning J, Hutchinson A, Marshall M. Research methods used in developing and applying quality indicators in primary care. *Br Med J*. 2003;326:816–9.
4. Lawrence M, Olesen F. Indicators of Quality in Health Care. *Eur J Gen Pract*. 1997;3(9):103–8.
5. Lowthian JA, Cameron PA, Stoelwinder JU, Curtis A, Currell A, Cooke MW, et al. Increasing utilisation of emergency ambulances. *Aust Heal Rev*. 2011;35(1):63–9.
6. Paramedics Australasia. Paramedicine Role Descriptions [Internet]. Melbourne: Paramedics Australasia; 2012. p. 1–23. Available from: <https://www.paramedics.org>
7. Von Vopelius-Feldt J, Bengler J. Who does what in prehospital critical care? An analysis of competencies of paramedics, critical care paramedics and prehospital physicians. *Emerg Med J*. 2014;31(12):1009–13.
8. Sayre MR, White LJ, Brown LH, Armacost M, Dean JM, Frame SB, et al. The National EMS Research Agenda. *Prehospital Emerg Care*. 2002;6(Suppl 3):1–43.
9. Owen RC. The development and testing of indicators of prehospital care quality [dissertation]. [Manchester]. University of Manchester; 2010.
10. Australian Government Productivity Commission - Steering Committee for the Review of Government Service Provision. Report on Government Services - Chapter 11 (Ambulance Services) [Internet]. Canberra; 2020. Available from: <https://www.pc.gov.au/research/ongoing/report-on-government-services/2019/health/ambulance-services>
11. Studnek JR, Garvey L, Blackwell T, Vandeventer S, Ward SR. Association between prehospital time intervals and ST-elevation myocardial infarction system performance. *Circulation*. 2010;122(15):1464–9.

- 1  
2  
3 529 12. Takahashi M, Kohsaka S, Miyata H, Yoshikawa T, Takagi A, Harada K, et al.  
4  
5 530 Association between prehospital time interval and short-term outcome in acute heart  
6  
7 531 failure patients. *J Card Fail.* 2011;17(9):742–7.  
8  
9 532 13. Byrne JP, Mann NC, Dai M, Mason SA, Karanicolas P, Rizoli S, et al. Association  
10  
11 533 between Emergency Medical Service Response Time and Motor Vehicle Crash  
12  
13 534 Mortality in the United States. *JAMA Surg.* 2019;154(4):286–93.  
14  
15 535 14. Blanchard IE, Doig CJ, Hagel BE, Anton AR, Zygun DA, Kortbeek JB, et al.  
16  
17 536 Emergency medical services response time and mortality in an urban setting.  
18  
19 537 *Prehospital Emerg Care.* 2012;16(1):142–51.  
20  
21 538 15. Pons PT, Haukoos JS, Bludworth W, Cribley T, Pons KA, Markovchick VJ. Paramedic  
22  
23 539 response time: Does it affect patient survival? *Acad Emerg Med.* 2005;12(7):594–600.  
24  
25 540 16. Durham M, Faulkner M, Deakin C. Targeted response? An exploration of why  
26  
27 541 ambulance services find government targets particularly challenging. *Br Med Bull.*  
28  
29 542 2016;120(1):35–42.  
30  
31 543 17. Pap R, Lockwood C, Stephenson M, Simpson P. Indicators to measure prehospital  
32  
33 544 care quality: a scoping review. *JB I Database Syst Rev Implement Reports.*  
34  
35 545 2018;16(11):2192–223.  
36  
37 546 18. Aromataris E, Munn Z, editors. The Joanna Briggs Institute Reviewer's Manual  
38  
39 547 [Internet]. The Joanna Briggs Institute; 2017. Available from:  
40  
41 548 <https://reviewersmanual.joannabriggs.org/>  
42  
43 549 19. Pap R, Lockwood C, Stephenson M, Simpson P. Indicators to measure pre-hospital  
44  
45 550 care quality: a scoping review protocol. *JB I Database Syst Rev Implement Reports.*  
46  
47 551 2017;15(6).  
48  
49 552 20. Campbell S., Roland M., Buetow S. Defining quality of care. *Soc Sci Med.*  
50  
51 553 2000;51:1611–25.  
52  
53 554 21. Munn Z, Lockwood C, Moola S. The Development and Use of Evidence Summaries  
54  
55 555 for Point of Care Information Systems: A Streamlined Rapid Review Approach.  
56  
57 556 *Worldviews Evidence-Based Nurs.* 2015;12(3):131–8.

- 557 22. Olausson A, Semple W, Oteir A, Todd P, Williams B. Paramedic literature search  
558 filters: Optimised for clinicians and academics. *BMC Med Inform Decis Mak*.  
559 2017;17(1):1–6.
- 560 23. Joanna Briggs Institute. The JBI Approach [Internet]. 2017. Available from:  
561 <http://joannabriggs.org/jbi-approach.html>
- 562 24. Ganann R, Ciliska D, Thomas H. Expediting systematic reviews: methods and  
563 implications of rapid reviews. 2010;1–10.
- 564 25. Wyer P, Rowe B. Evidence-based reviews and databases: are they worth the effort?  
565 Developing evidence summaries for emergency medicine. *Acad Emerg Med*. 2007  
566 Nov;14(11):960–4.
- 567 26. Nair R, Aggarwal R, Khanna D. Methods of Formal Consensus in  
568 Classification/Diagnostic Criteria and Guideline Development. *Semin Arthritis Rheum*.  
569 2011;41(2):95–105.
- 570 27. Fitch K, Bernstein SJJ, Aguilar MDD, Burnand B, LaCalle JRR, Lazaro P, et al. The  
571 RAND/UCLA Appropriateness Method User's Manual [Internet]. 2001. 109 p.  
572 Available from: <http://www.rand.org>
- 573 28. Borah R, Brown AW, Capers PL, Kaiser KA. Analysis of the time and workers needed  
574 to conduct systematic reviews of medical interventions using data from the  
575 PROSPERO registry. *BMJ Open*. 2017;7(2):e012545.
- 576 29. Khodyakov D, Hempel S, Rubenstein L, Shekelle P, Foy R, Salem-Schatz S, et al.  
577 Conducting Online Expert panels: a feasibility and experimental replicability study.  
578 *BMC Med Res Methodol*. 2011 Dec;11(1):174–82.
- 579 30. Perla RJ, Provost LP, Parry GJ. Seven propositions of the science of improvement:  
580 exploring foundations. *Qual Manag Health Care*. 2013;22(3):170–86.
- 581 31. Levy PE, Williams JR. The social context of performance appraisal: A review and  
582 framework for the future. *J Manage*. 2004;30(6):881–905.
- 583 32. Hedge JW, Teachout MS. Exploring the Concept of Acceptability as a Criterion for  
584 Evaluating Performance Measures. *Gr Organ Manag*. 2000;25(1):22–44.

- 1  
2  
3 585 33. Sekhon M, Cartwright M, Francis JJ. Acceptability of healthcare interventions: An  
4  
5 586 overview of reviews and development of a theoretical framework. BMC Health Serv  
6  
7 587 Res. 2017;17(1):1–13.  
8  
9 588 34. Biesta G. Pragmatism and the Philosophical Foundations of Mixed Methods  
10  
11 589 Research. In: Tashakkori A, Teddlie C, editors. SAGE Handbook of Mixed Methods in  
12  
13 590 Social and Behavioral Research. 2nd ed. Thousand Oaks, CA: SAGE Publications,  
14  
15 591 Inc.; 2010.  
16  
17 592 35. Australian Health Practitioner Regulation Agency (AHPRA). Annual Report 2018/19  
18  
19 593 Our National Scheme: For safer healthcare [Internet]. Canberra; 2019. Available from:  
20  
21 594 <https://www.ahpra.gov.au>  
22  
23 595 36. Sullivan GM, Artino AR. Analyzing and Interpreting Data From Likert-Type Scales. J  
24  
25 596 Grad Med Educ. 2013;5(4):541–2.  
26  
27 597 37. Harpe SE. How to analyze Likert and other rating scale data. Curr Pharm Teach  
28  
29 598 Learn. 2015;7(6):836–50.  
30  
31 599 38. Creswell J, Plano Clark V. Designing and conducting mixed methods research. 2nd  
32  
33 600 ed. Los Angeles: Sage Publications Inc.; 2011. 457 p.  
34  
35 601 39. Palinkas LA, Horwitz SM, Green CA, Wisdom JP, Duan N, Hoagwood K. Purposeful  
36  
37 602 Sampling for Qualitative Data Collection and Analysis in Mixed Method  
38  
39 603 Implementation Research. Adm Policy Ment Heal Ment Heal Serv Res.  
40  
41 604 2015;42(5):533–44.  
42  
43 605 40. Saunders B, Sim J, Kingstone T, Baker S, Waterfield J, Bartlam B, et al. Saturation in  
44  
45 606 qualitative research: exploring its conceptualization and operationalization. Qual  
46  
47 607 Quant. 2018;52(4):1893–907.  
48  
49 608 41. Sandelowski M. What's in a name? Qualitative description revisited. Res Nurs Heal.  
50  
51 609 2010;33(1):77–84.  
52  
53 610 42. Vaismoradi M, Turunen H, Bondas T. Content analysis and thematic analysis:  
54  
55 611 Implications for conducting a qualitative descriptive study. Nurs Heal Sci.  
56  
57 612 2013;15(3):398–405.  
58  
59  
60

- 613 43. Castleberry A, Nolen A. Thematic analysis of qualitative research data: Is it as easy  
614 as it sounds? *Curr Pharm Teach Learn*. 2018;10(6):807–15.
- 615 44. Erlingsson C, Brysiewicz P. A hands-on guide to doing content analysis. *African J*  
616 *Emerg Med*. 2017;7(3):93–9.
- 617 45. Hadi MA, José Closs S. Ensuring rigour and trustworthiness of qualitative research in  
618 clinical pharmacy. *Int J Clin Pharm*. 2016;38(3):641–6.
- 619 46. Jones P, Shepherd M, Wells S, Le Fevre J, Ameratunga S. Review article: what  
620 makes a good healthcare quality indicator? A systematic review and validation study.  
621 *Emerg Med Australas*. 2014;26(2):113–24.
- 622 47. Barr S. Practical Performance Measurement: Using the PuMP Blueprint for Fast, Easy  
623 and Engaging KPIs. Samford: PuMP Press; 2014. 356 p.
- 624 48. Siriwardena N, Gillam S. Measuring for improvement. *Qual Prim Care*. 2013;21:293–  
625 301.
- 626 49. Donabedian A. The Quality of Care: How Can It Be Assessed? *J Am Med A*.  
627 1988;260(12):1743–8.
- 628 50. Kötter T, Blozik E, Scherer M. Methods for the guideline-based development of quality  
629 indicators - a systematic review. *Implement Sci*. 2012;7(1):21.
- 630 51. Mainz J. Developing evidence-based clinical indicators: a state of the art methods  
631 primer. *Int J Qual Heal Care*. 2003;15(Supp 1):i5–11.
- 632 52. Campbell S, Kontopantelis E, Hannon K, Burke M, Barber A, Lester H. Framework  
633 and indicator testing protocol for developing and piloting quality indicators for the UK  
634 quality and outcomes framework. *BMC Fam Pract*. 2011;12(1):85.
- 635 53. Krabbe PFM. The Measurement of Health and Health Status: Concepts, Methods and  
636 Applications from a Multidisciplinary Perspective. San Diego: Elsevier Science &  
637 Technology; 2016. 380 p.
- 638 54. Delnoij DMJ, Westert GP. Assessing the validity of quality indicators: Keep the  
639 context in mind! *Eur J Public Health*. 2012;22(4):452–3.
- 640 55. Lawrence M, Olesen F. Indicators of Quality in Health Care. *Eur J Gen Pract*.

- 641 2009;3(3):103–8.
- 642 56. Frongillo EA, Baranowski T, Subar AF, Tooze JA, Kirkpatrick SI. Establishing Validity  
643 and Cross-Context Equivalence of Measures and Indicators. *J Acad Nutr Diet*.  
644 2018;1–14.
- 645 57. Marshall MN, Shekelle PG, McGlynn E a, Campbell S, Brook RH, Roland MO. Can  
646 health care quality indicators be transferred between countries? *Qual Saf Health*  
647 *Care*. 2003;12(1):8–12.
- 648 58. Campbell SM, Braspenning J, Hutchinson A, Marshall MN. Research Methods Used  
649 in Developing and Applying Quality Indicators in Primary Care. *Qual Saf Heal Care*.  
650 2002;11:358–64.
- 651 59. Campbell SM, Cantrill JA. Consensus methods in prescribing research. *J Clin Pharm*  
652 *Ther*. 2001;26:5–14.
- 653 60. Siriwardena AN, Gillam S. Quality improvement in primary care: The essential guide.  
654 London: CRC Press, Taylor & Francis Group; 2014. 159 p.
- 655 61. Sollecito WA, Johnson JK. McLaughlin and Kaluzny's Continuous Quality  
656 Improvement in Health Care. 4th ed. Burlington, MA: Jones & Bartlett Learning; 2013.  
657 619 p.
- 658 62. Lloyd R. Quality Health Care: A Guide to Developing and Using Indicators. Sudbury,  
659 MA: Jones and Bartlett; 2004. 343 p.
- 660 63. Mainz J. Quality indicators: Essential for quality improvement. *Int J Qual Heal Care*.  
661 2004;16(Suppl. 1):10–1.
- 662 64. Wollersheim H, Hermens R, Hulscher M, Braspenning J, Ouwens M, Schouten J, et  
663 al. Clinical indicators: Development and applications. *Neth J Med*. 2007;65(1):15–22.
- 664 65. American Educational Research Association, American Psychological Association,  
665 National Council on Measurement in Education. Standards for Educational and  
666 Psychological Testing. Washington, DC: American Educational Research Association;  
667 2014. 230 p.
- 668 66. Teddlie C, Tashakkori A. Overview of Contemporary Issues in Mixed Methods

- Research. In: Tashakkori A, Teddlie C, editors. SAGE Handbook of Mixed Methods in Social and Behavioral Research. 2nd ed. Thousand Oaks, CA: SAGE Publications, Inc.; 2010.
67. Onwuegbuzie A, Combs J. Emergent Data Analysis Techniques in Mixed Methods Research: A Synthesis. In: Teddlie C, Tashakkori A, editors. SAGE Handbook of Mixed Methods in Social and Behavioral Research. 2nd ed. Thousand Oaks, California: SAGE Publications, Inc.; 2010.
68. Bowles KH, Holmes JH, Naylor MD, Liberatore M, Nydick R. Expert consensus for discharge referral decisions using online delphi. AMIA Annu Symp Proc. 2003;106–9.
69. Snyder-Halpern R, Thompson CB, Schaffer J. Comparison of mailed vs. Internet applications of the Delphi technique in clinical informatics research. Proc AMIA Symp. 2000;809–13.

1  
2  
3  
4  
5  
6  
7  
8  
9  
10  
11  
12  
13  
14  
15  
16  
17  
18  
19  
20  
21  
22  
23  
24  
25  
26  
27  
28  
29  
30  
31  
32  
33  
34  
35  
36  
37  
38  
39  
40  
41  
42  
43  
44  
45  
46  
47  
48  
49  
50  
51  
52  
53  
54  
55  
56  
57  
58  
59  
60

**List of abbreviations**

AS: Ambulance Service; CINAHL: Cumulative Index to Nursing and Allied Health Literature;  
CV: Curriculum Vitae; JBI: Joanna Briggs Institute; QI: Quality Indicator; RAM: RAND/UCLA  
Appropriateness Method; RAND Corporation: Research and Development Corporation;  
UCLA: University of California Los Angeles

**Authors' contributions**

RP is the guarantor. RP incepted the project and prepared the manuscript. CL, MS and PS  
reviewed drafts to help refine the manuscript. All authors have read and approved the final  
draft.

**Funding statement**

This project is supported by an Australian Government Research Training Program  
Scholarship. This project is in part supported by a research grant from the Australasian  
College of Paramedicine (ACP).

**Competing interests**

The authors declare that they have no competing interests.

**Word Count**

4924

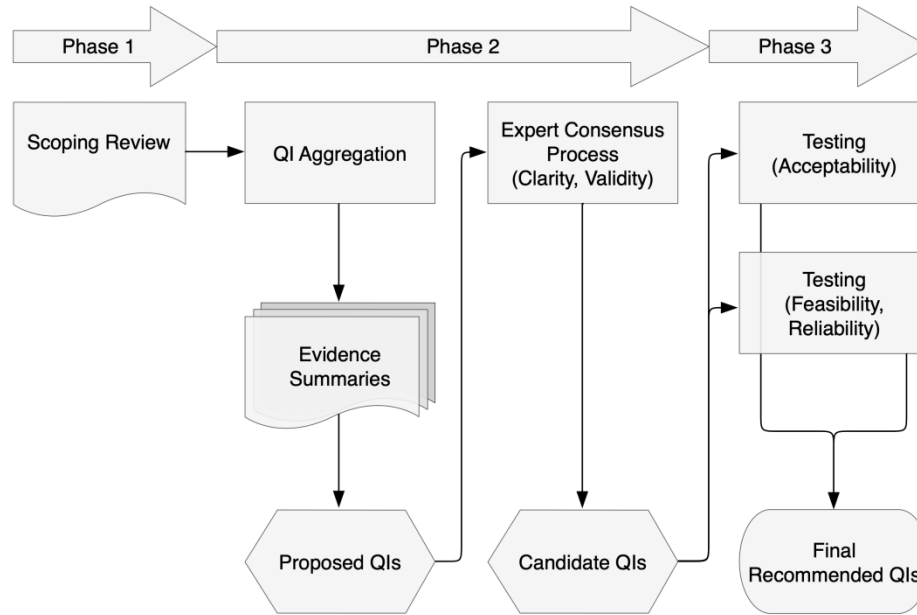

Figure 1: Flow diagram detailing the three phases of the project (QI: quality indicator)

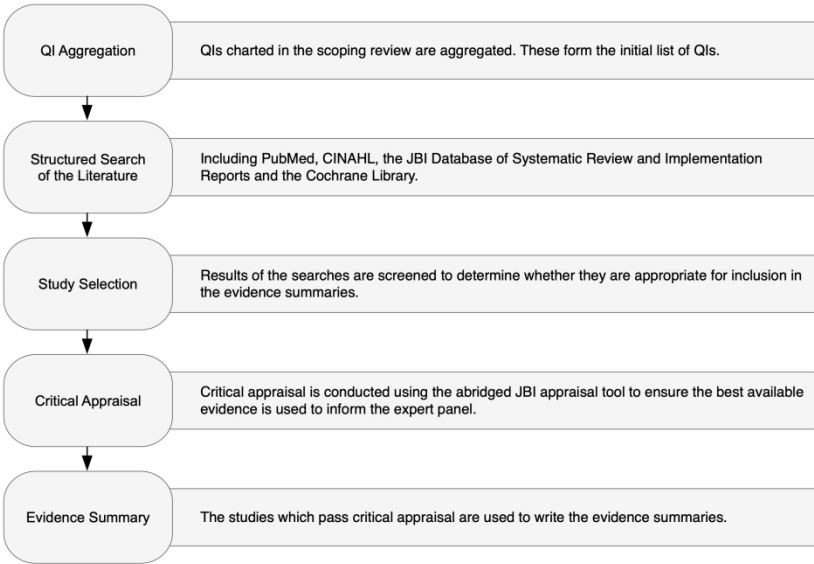

Figure 2: The evidence summary development process (adopted from Munn, Lockwood & Moola, 201532)

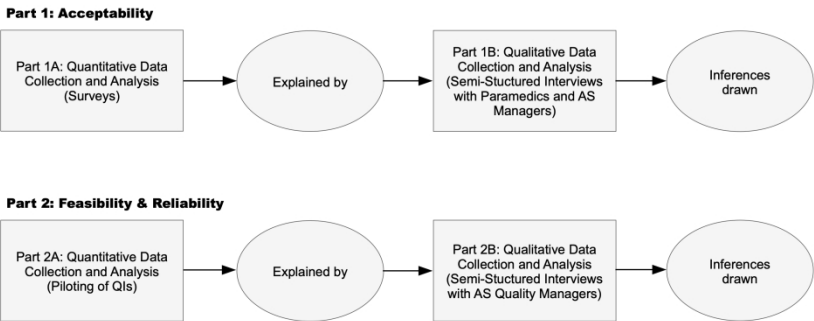

Figure 3: Explanatory sequential design of phase 3 (AS: ambulance service)
